# Supplementary material
Source: PubMed Central journal article supplement (PMC4567475)
Supplement: NIHMS710824-supplement-Online_Supplement.pdf [file NIHMS710824-supplement-Online_Supplement.pdf]

## ONLINE SUPPLEMENT

### **Endogenous microRNAs in Human Microvascular Endothelial Cells Regulate mRNAs Encoded by Hypertension-Related Genes**

Alison J. Kriegel, Maria Angeles Baker, Yong Liu, Pengyuan Liu, Allen W. Cowley, Jr., and Mingyu Liang.

Department of Physiology and Center of Systems Molecular Medicine, Medical College of Wisconsin, Milwaukee, WI 53226

Running title: Endothelial miRNAs relevant to hypertension

#### **Supplementary methods, 3 tables and 2 figures**

Corresponding author:

Mingyu Liang or Alison J. Kriegel  
Department of Physiology  
Medical College of Wisconsin  
8701 Watertown Plank Road  
Milwaukee, WI 53226  
Phone: 414-955-4835  
Fax: 414-955-6568  
[mliang@mcw.edu](mailto:mliang@mcw.edu) or [akriegel@mcw.edu](mailto:akriegel@mcw.edu)

*Note: Supplemental Tables were converted to PDF per journal requirements. Datasets in analyzable formats such as Excel are available upon request.*

## Supplemental Methods-

Cell culture- Human dermal microvascular endothelial cells (HMVEC-D) were cultured in EGM – MV medium (Clonetics).<sup>1</sup> Cells were subcultured at 80% confluency for propagation.

RNA extraction- RNA for small RNA deep sequencing was extracted using a chloroform/trizol method, as previously described,<sup>2</sup> from cells cultured in 35 mm dishes and collected at >90% confluency. Total RNA was quantified by Nanodrop. The RNA from the transfected cells was extracted from 96 well plates using the Aurum Total RNA 96 Kit (BioRad) and resuspended in RNase-free water. Samples were stored at -80°C until the RNA was analyzed.

Small RNA deep sequencing- Equal amounts of RNA from 6 plates of HMVEC-D cells were pooled, to produce 2 pools (3 plates/pool). Small RNA libraries were created using the TruSeq Small RNA Sample Preparation Kit (Illumina) and cluster generation and sequencing performed using TruSeq PE Cluster Kit v3-cBot-HS, TruSeq SBS kit v3-HS, and a HiSeq 2000 sequencer (Illumina), as previously described.<sup>3</sup>

Analysis of small RNA deep sequencing data- Small RNA deep sequencing data was analyzed as previously described,<sup>3</sup> except that sequencing reads were mapped against miRBase v18. miRNA expression levels were normalized using the quartile method.<sup>3</sup>

Identification of genes involved with blood pressure regulation and hypertension- The literature was reviewed to identify and compile a list of genes involved in blood pressure regulation and/or hypertension and likely expressed in endothelial cells. Hypertension risk genes identified by human GWAS were obtained from the literature.<sup>4,5</sup>

Inhibition of endogenous miRNA using LNA anti-miR- HMVEC-D cells were subcultured onto 96 well plates and transfected at >90% confluency with locked nucleic acid (LNA)-modified anti-miRs from Exiqon.<sup>6,7</sup> Transfections of LNA anti-miR at a final concentration of 10 nM were performed using Lipofectamine 2000 (following manufacturer instructions).

Real-time PCR- mRNA expression levels of the blood pressure/hypertension related genes predicted to be targeted by miRNAs inhibited by anti-miR transfection were measured by qPCR using SYBR green chemistry, as previously described.<sup>2</sup> These genes included *ADM1*, *ADRA1B*, *ADRA1D*, *ADRA2A*, *ADRA2B*, *ADRB1*, *ATP2B1*, *CAT*, *EDN1*, *EDNRA*, *EDNRB*, *FGF5*, *FURIN-FES*, *GOSR2*, *NOX2*, *NOX4*, *PLECKHA7*, *SH2B3*, *TBX3*, and *TBX5*. Primer sequences are listed in **Supplemental Table S3**.

Chronic Blood Pressure Measurement in anti-miR treated mice- Male C57BL/6J mice (Jackson Lab) were maintained on AIN-76A diet (Dyets) containing 0.4% NaCl after receipt. Telemeters were implanted into the carotid artery at 10 weeks of age, and animals were allowed to recover for 5 days prior to the start of 24 hour blood pressure monitoring. Mice received intraperitoneal injection of LNA-anti-miR-21 or scrambled LNA-anti-miR (Exiqon) (10 mg/kg body weight, in saline) or switched to AIN-76A diet containing 4% NaCl as explained in Results.

Measurement of hydrogen peroxide (H<sub>2</sub>O<sub>2</sub>) release- HMVEC-D were cultured and transfected with LNA-anti-miR as described above. At 48 hours after transfection an Amplex Red Assay (Life Technologies) was performed to measure the H<sub>2</sub>O<sub>2</sub> released from the cells over a 5.5 hour period. H<sub>2</sub>O<sub>2</sub> signal was normalized by total protein in each well to account for cell number.

## References:

1. Liang M, Pietrusz JL. Thiol-related genes in diabetic complications: a novel protective role for endogenous thioredoxin 2. *Arteriosclerosis, thrombosis, and vascular biology*. 2007;27:77-83.
2. Kriegel AJ, Fang Y, Liu Y, et al. MicroRNA-target pairs in human renal epithelial cells treated with transforming growth factor beta 1: a novel role of miR-382. *Nucleic acids research*. 2010;38:8338-8347.
3. Kriegel AJ, Liu Y, Liu P, Baker MA, Hodges MR, Hua X, Liang M. Characteristics of microRNAs enriched in specific cell types and primary tissue types in solid organs. *Physiol Genomics*. 2013;45:1144-1156.
4. Ehret GB. Genome-wide association studies: contribution of genomics to understanding blood pressure and essential hypertension. *Curr Hypertens Rep*. 2010;12:17-25.
5. International Consortium for Blood Pressure Genome-Wide Association Studies, Ehret GB, Munroe PB, et al. Genetic variants in novel pathways influence blood pressure and cardiovascular disease risk. *Nature*. 2011;478:103-109.
6. Mladinov D, Liu Y, Mattson DL, Liang M. MicroRNAs contribute to the maintenance of cell-type-specific physiological characteristics: miR-192 targets Na<sup>+</sup>/K<sup>+</sup>-ATPase beta1. *Nucleic acids research*. 2013;41:1273-1283.
7. Xu X, Kriegel AJ, Liu Y, Usa K, Mladinov D, Liu H, Fang Y, Ding X, Liang M. Delayed ischemic preconditioning contributes to renal protection by upregulation of miR-21. *Kidney international*. 2012;82:1167-1175.

**Supplemental Table S1. Small RNA deep sequencing result.**

| <b>miRbase v18 ID</b> | <b>miRNA category</b> | <b>HMVEC-D pool 1</b> | <b>HMVEC-D pool 2</b> | <b>Pool Average</b> |
|-----------------------|-----------------------|-----------------------|-----------------------|---------------------|
| hsa-miR-10b-5p        | mature_unique         | 2,034,760             | 2,658,905             | 2,346,832           |
| hsa-miR-22-3p         | mature_unique         | 1,132,311             | 1,132,635             | 1,132,473           |
| hsa-miR-10a-5p        | mature_unique         | 901,041               | 1,145,679             | 1,023,360           |
| hsa-miR-126-5p        | mature_unique         | 881,777               | 897,159               | 889,468             |
| hsa-let-7a-5p         | mature_unique         | 759,738               | 991,392               | 875,565             |
| hsa-miR-21-5p         | mature_unique         | 663,316               | 743,919               | 703,617             |
| hsa-miR-222-3p        | mature_unique         | 647,314               | 547,468               | 597,391             |
| hsa-miR-127-3p        | mature_unique         | 494,543               | 535,541               | 515,042             |
| hsa-miR-191-5p        | mature_unique         | 420,577               | 455,747               | 438,162             |
| hsa-miR-100-5p        | mature_unique         | 255,959               | 323,501               | 289,730             |
| hsa-miR-181a-5p       | mature_unique         | 274,708               | 268,503               | 271,605             |
| hsa-miR-30a-5p        | mature_unique         | 272,270               | 207,750               | 240,010             |
| hsa-let-7f-5p         | mature_unique         | 170,010               | 191,778               | 180,894             |
| hsa-miR-26a-5p        | mature_unique         | 164,653               | 188,534               | 176,594             |
| hsa-miR-92a-3p        | mature_unique         | 161,253               | 170,748               | 166,001             |
| hsa-miR-151a-3p       | mature_unique         | 174,508               | 156,345               | 165,426             |
| hsa-miR-221-3p        | mature_unique         | 128,975               | 179,397               | 154,186             |
| hsa-miR-27b-3p        | mature_unique         | 129,628               | 131,514               | 130,571             |
| hsa-miR-125a-5p       | mature_unique         | 115,068               | 107,589               | 111,329             |
| hsa-miR-151a-5p       | mature_unique         | 94,328                | 100,719               | 97,523              |
| hsa-miR-28-3p         | mature_unique         | 106,964               | 88,583                | 97,773              |
| hsa-miR-99b-5p        | mature_unique         | 78,635                | 84,502                | 81,569              |
| hsa-let-7i-5p         | mature_unique         | 86,155                | 71,738                | 78,947              |
| hsa-miR-126-3p        | mature_unique         | 51,748                | 66,542                | 59,145              |
| hsa-let-7e-5p         | mature_unique         | 51,988                | 60,613                | 56,301              |
| hsa-miR-92b-3p        | mature_unique         | 53,637                | 56,532                | 55,085              |
| hsa-miR-146a-5p       | mature_unique         | 46,838                | 48,999                | 47,919              |
| hsa-miR-186-5p        | mature_unique         | 49,310                | 44,152                | 46,731              |
| hsa-let-7b-5p         | mature_unique         | 42,580                | 48,581                | 45,580              |
| hsa-miR-98            | mature_unique         | 39,180                | 48,651                | 43,915              |
| hsa-miR-423-3p        | mature_unique         | 49,756                | 35,433                | 42,595              |
| hsa-miR-30d-5p        | mature_unique         | 38,768                | 38,363                | 38,565              |
| hsa-miR-27a-3p        | mature_unique         | 40,485                | 36,096                | 38,290              |
| hsa-miR-21-3p         | mature_unique         | 44,983                | 26,993                | 35,988              |
| hsa-miR-181b-5p       | mature_unique         | 40,176                | 30,062                | 35,119              |
| hsa-miR-125b-5p       | mature_unique         | 33,137                | 31,422                | 32,279              |
| hsa-miR-16-5p         | mature_unique         | 26,818                | 32,643                | 29,731              |
| hsa-miR-409-3p        | mature_unique         | 26,956                | 27,133                | 27,044              |
| hsa-let-7g-5p         | mature_unique         | 21,084                | 32,434                | 26,759              |
| hsa-miR-654-3p        | mature_unique         | 22,698                | 29,609                | 26,153              |
| hsa-miR-423-5p        | mature_unique         | 31,557                | 20,297                | 25,927              |
| hsa-miR-31-5p         | mature_unique         | 23,144                | 23,680                | 23,412              |
| hsa-miR-3182          | mature_unique         | 24,552                | 22,320                | 23,436              |
| hsa-miR-411-5p        | mature_unique         | 21,668                | 22,320                | 21,994              |

|                        |               |        |        |        |
|------------------------|---------------|--------|--------|--------|
| hsa-miR-103a-3p        | mature_unique | 18,680 | 23,541 | 21,110 |
| hsa-miR-103b           | mature_unique | 17,993 | 21,378 | 19,686 |
| hsa-miR-3184-3p        | mature_unique | 23,247 | 14,473 | 18,860 |
| hsa-miR-30e-5p         | mature_unique | 20,637 | 16,217 | 18,427 |
| hsa-miR-25-3p          | mature_unique | 17,135 | 18,484 | 17,809 |
| hsa-let-7c             | mature_unique | 15,006 | 15,868 | 15,437 |
| hsa-miR-148b-3p        | mature_unique | 14,010 | 16,356 | 15,183 |
| hsa-miR-381            | mature_unique | 16,105 | 13,253 | 14,679 |
| hsa-miR-29a-3p         | mature_unique | 13,495 | 13,915 | 13,705 |
| hsa-miR-30c-5p         | mature_unique | 12,740 | 13,148 | 12,944 |
| hsa-miR-23a-3p         | mature_unique | 10,576 | 13,601 | 12,089 |
| hsa-miR-24-3p          | mature_unique | 11,984 | 11,021 | 11,502 |
| hsa-miR-221-5p         | mature_unique | 8,070  | 16,287 | 12,178 |
| hsa-miR-30a-3p         | mature_unique | 9,546  | 11,823 | 10,684 |
| hsa-miR-26b-5p         | mature_unique | 8,276  | 12,695 | 10,485 |
| hsa-miR-941            | mature_unique | 9,134  | 8,789  | 8,961  |
| hsa-miR-345-5p         | mature_unique | 9,649  | 8,091  | 8,870  |
| hsa-miR-181a-3p        | mature_unique | 7,211  | 7,777  | 7,494  |
| hsa-miR-3074-5p        | mature_unique | 8,276  | 6,591  | 7,433  |
| hsa-miR-769-5p         | mature_unique | 6,181  | 8,649  | 7,415  |
| hsa-let-7d-5p          | mature_unique | 6,833  | 7,463  | 7,148  |
| hsa-miR-410            | mature_unique | 6,250  | 7,359  | 6,804  |
| hsa-miR-125b-1-3p      | mature_unique | 7,314  | 5,057  | 6,185  |
| hsa-miR-136-3p         | mature_unique | 6,353  | 5,266  | 5,809  |
| hsa-miR-28-5p          | mature_unique | 4,910  | 5,615  | 5,263  |
| hsa-miR-320a           | mature_unique | 5,563  | 4,499  | 5,031  |
| hsa-miR-484            | mature_unique | 4,670  | 4,708  | 4,689  |
| hsa-miR-486-5p         | mature_unique | 4,567  | 4,464  | 4,516  |
| hsa-miR-500a-3p        | mature_unique | 4,395  | 4,290  | 4,342  |
| hsa-miR-1260b          | mature_unique | 3,915  | 3,697  | 3,806  |
| hsa-miR-589-5p         | mature_unique | 4,086  | 3,522  | 3,804  |
| hsa-miR-874            | mature_unique | 3,606  | 3,836  | 3,721  |
| hsa-miR-34a-5p         | mature_unique | 3,331  | 3,836  | 3,584  |
| hsa-miR-378a-3p        | mature_unique | 3,846  | 3,104  | 3,475  |
| hsa-miR-125b-2-3p      | mature_unique | 3,983  | 2,964  | 3,474  |
| hsa-miR-93-5p          | mature_unique | 3,228  | 3,627  | 3,427  |
| hsa-miR-130b-3p        | mature_unique | 2,987  | 3,522  | 3,255  |
| hsa-miR-574-3p         | mature_unique | 3,159  | 3,174  | 3,166  |
| hsa-miR-155-5p         | mature_unique | 3,262  | 2,999  | 3,131  |
| hsa-miR-23b-3p         | mature_unique | 2,335  | 4,011  | 3,173  |
| hsa-miR-134            | mature_unique | 2,953  | 3,069  | 3,011  |
| hsa-miR-130a-3p        | mature_unique | 2,884  | 2,825  | 2,855  |
| hsa-miR-224-5p         | mature_unique | 2,816  | 2,860  | 2,838  |
| hsa-miR-192-5p         | mature_unique | 2,987  | 2,511  | 2,749  |
| hsa-miR-140-3p         | mature_unique | 2,541  | 2,651  | 2,596  |
| hsa-miR-889            | mature_unique | 2,301  | 2,755  | 2,528  |
| hsa-miR-199a-3p#hsa-rr | mature_unique | 2,507  | 2,197  | 2,352  |

|                   |               |       |       |       |
|-------------------|---------------|-------|-------|-------|
| hsa-miR-671-3p    | mature_unique | 2,747 | 1,883 | 2,315 |
| hsa-miR-30e-3p    | mature_unique | 1,751 | 2,825 | 2,288 |
| hsa-miR-361-5p    | mature_unique | 1,717 | 2,790 | 2,253 |
| hsa-miR-101-3p    | mature_unique | 2,472 | 1,814 | 2,143 |
| hsa-miR-100-3p    | mature_unique | 2,404 | 1,535 | 1,969 |
| hsa-miR-20a-5p    | mature_unique | 1,580 | 2,197 | 1,888 |
| hsa-miR-340-5p    | mature_unique | 1,957 | 1,709 | 1,833 |
| hsa-miR-197-3p    | mature_unique | 1,545 | 2,162 | 1,854 |
| hsa-miR-421       | mature_unique | 1,820 | 1,709 | 1,764 |
| hsa-miR-584-5p    | mature_unique | 2,095 | 1,395 | 1,745 |
| hsa-miR-532-5p    | mature_unique | 1,751 | 1,604 | 1,678 |
| hsa-miR-744-5p    | mature_unique | 2,129 | 1,290 | 1,710 |
| hsa-miR-193a-5p   | mature_unique | 1,374 | 1,988 | 1,681 |
| hsa-miR-181a-2-3p | mature_unique | 1,889 | 1,360 | 1,624 |
| hsa-let-7b-3p     | mature_unique | 1,477 | 1,674 | 1,575 |
| hsa-miR-15b-5p    | mature_unique | 1,133 | 2,058 | 1,595 |
| hsa-miR-99a-5p    | mature_unique | 1,133 | 1,988 | 1,561 |
| hsa-miR-450b-5p   | mature_unique | 1,580 | 1,395 | 1,487 |
| hsa-miR-130b-5p   | mature_unique | 1,580 | 1,221 | 1,400 |
| hsa-miR-181c-5p   | mature_unique | 1,168 | 1,569 | 1,368 |
| hsa-miR-19b-3p    | mature_unique | 1,236 | 1,430 | 1,333 |
| hsa-miR-146b-5p   | mature_unique | 1,442 | 1,186 | 1,314 |
| hsa-miR-424-5p    | mature_unique | 1,305 | 1,290 | 1,298 |
| hsa-miR-432-5p    | mature_unique | 1,442 | 1,151 | 1,297 |
| hsa-miR-143-3p    | mature_unique | 1,717 | 907   | 1,312 |
| hsa-miR-27a-5p    | mature_unique | 1,236 | 1,116 | 1,176 |
| hsa-let-7d-3p     | mature_unique | 1,236 | 1,011 | 1,124 |
| hsa-miR-152       | mature_unique | 790   | 1,500 | 1,145 |
| hsa-miR-29c-3p    | mature_unique | 1,408 | 837   | 1,122 |
| hsa-miR-128       | mature_unique | 927   | 1,221 | 1,074 |
| hsa-miR-301a-3p   | mature_unique | 893   | 1,151 | 1,022 |
| hsa-miR-17-5p     | mature_unique | 961   | 1,046 | 1,004 |
| hsa-miR-370       | mature_unique | 961   | 1,046 | 1,004 |
| hsa-miR-181c-3p   | mature_unique | 893   | 1,011 | 952   |
| hsa-miR-431-5p    | mature_unique | 961   | 907   | 934   |
| hsa-miR-1307-3p   | mature_unique | 1,064 | 802   | 933   |
| hsa-miR-758       | mature_unique | 824   | 977   | 900   |
| hsa-miR-1304-3p   | mature_unique | 927   | 837   | 882   |
| hsa-miR-501-3p    | mature_unique | 961   | 802   | 882   |
| hsa-miR-424-3p    | mature_unique | 790   | 977   | 883   |
| hsa-miR-374a-3p   | mature_unique | 755   | 942   | 849   |
| hsa-miR-4455      | mature_unique | 824   | 802   | 813   |
| hsa-miR-339-3p    | mature_unique | 893   | 663   | 778   |
| hsa-miR-181d      | mature_unique | 618   | 942   | 780   |
| hsa-miR-342-3p    | mature_unique | 515   | 1,116 | 816   |
| hsa-miR-15a-5p    | mature_unique | 652   | 872   | 762   |
| hsa-miR-195-5p    | mature_unique | 549   | 872   | 711   |

|                        |               |       |       |       |
|------------------------|---------------|-------|-------|-------|
| hsa-miR-374c-3p        | mature_unique | 927   | 488   | 708   |
| hsa-miR-30b-5p         | mature_unique | 549   | 802   | 676   |
| hsa-miR-365a-3p#hsa-rr | mature_unique | 652   | 663   | 658   |
| hsa-miR-369-5p         | mature_unique | 721   | 558   | 640   |
| hsa-miR-23a-5p         | mature_unique | 515   | 767   | 641   |
| hsa-miR-1910           | mature_unique | 652   | 593   | 623   |
| hsa-miR-654-5p         | mature_unique | 584   | 663   | 623   |
| hsa-miR-455-3p         | mature_unique | 481   | 732   | 607   |
| hsa-miR-425-5p         | mature_unique | 309   | 1,116 | 713   |
| hsa-miR-301b           | mature_unique | 618   | 558   | 588   |
| hsa-miR-582-3p         | mature_unique | 515   | 663   | 589   |
| hsa-miR-183-5p         | mature_unique | 2,369 | 140   | 1,254 |
| hsa-miR-455-5p         | mature_unique | 652   | 488   | 570   |
| hsa-miR-139-5p         | mature_unique | 412   | 767   | 590   |
| hsa-miR-450a-5p        | mature_unique | 687   | 453   | 570   |
| hsa-miR-3184-5p        | mature_unique | 481   | 628   | 554   |
| hsa-miR-193b-3p        | mature_unique | 549   | 523   | 536   |
| hsa-miR-379-5p         | mature_unique | 584   | 453   | 519   |
| hsa-miR-30c-2-3p       | mature_unique | 515   | 488   | 502   |
| hsa-miR-497-5p         | mature_unique | 515   | 488   | 502   |
| hsa-miR-665            | mature_unique | 515   | 488   | 502   |
| hsa-miR-574-5p         | mature_unique | 412   | 593   | 502   |
| hsa-miR-106b-3p        | mature_unique | 515   | 453   | 484   |
| hsa-miR-548k           | mature_unique | 549   | 419   | 484   |
| hsa-miR-299-3p         | mature_unique | 481   | 419   | 450   |
| hsa-miR-1307-5p        | mature_unique | 824   | 244   | 534   |
| hsa-miR-660-5p         | mature_unique | 275   | 732   | 504   |
| hsa-miR-374a-5p        | mature_unique | 412   | 488   | 450   |
| hsa-miR-3168           | mature_unique | 618   | 314   | 466   |
| hsa-miR-29b-3p         | mature_unique | 721   | 244   | 483   |
| hsa-miR-485-5p         | mature_unique | 721   | 244   | 483   |
| hsa-miR-323b-3p        | mature_unique | 446   | 349   | 398   |
| hsa-miR-330-5p         | mature_unique | 378   | 384   | 381   |
| hsa-miR-720            | mature_unique | 378   | 384   | 381   |
| hsa-miR-4532           | mature_unique | 824   | 174   | 499   |
| hsa-miR-4677-3p        | mature_unique | 343   | 419   | 381   |
| hsa-miR-487b           | mature_unique | 412   | 349   | 380   |
| hsa-miR-411-3p         | mature_unique | 343   | 384   | 364   |
| hsa-miR-887            | mature_unique | 618   | 209   | 414   |
| hsa-miR-1296           | mature_unique | 275   | 453   | 364   |
| hsa-miR-323a-3p        | mature_unique | 309   | 384   | 346   |
| hsa-miR-149-5p         | mature_unique | 172   | 558   | 365   |
| hsa-miR-542-3p         | mature_unique | 275   | 349   | 312   |
| hsa-miR-222-5p         | mature_unique | 275   | 314   | 294   |
| hsa-miR-376c           | mature_unique | 309   | 244   | 277   |
| hsa-miR-452-5p         | mature_unique | 309   | 244   | 277   |
| hsa-miR-935            | mature_unique | 309   | 244   | 277   |



|                        |               |     |     |     |
|------------------------|---------------|-----|-----|-----|
| hsa-miR-2682-5p        | mature_unique | 515 | 140 | 327 |
| hsa-miR-4301           | mature_unique | 343 | 209 | 276 |
| hsa-miR-361-3p         | mature_unique | 240 | 279 | 260 |
| hsa-miR-10a-3p         | mature_unique | 172 | 349 | 260 |
| hsa-miR-379-3p         | mature_unique | 172 | 314 | 243 |
| hsa-miR-125a-3p        | mature_unique | 309 | 174 | 242 |
| hsa-miR-19a-3p         | mature_unique | 309 | 174 | 242 |
| hsa-miR-26b-3p         | mature_unique | 309 | 174 | 242 |
| hsa-miR-3605-3p        | mature_unique | 309 | 174 | 242 |
| hsa-miR-3909           | mature_unique | 206 | 244 | 225 |
| hsa-miR-339-5p         | mature_unique | 137 | 314 | 226 |
| hsa-miR-27b-5p         | mature_unique | 240 | 174 | 207 |
| hsa-miR-132-3p         | mature_unique | 275 | 140 | 207 |
| hsa-miR-377-5p         | mature_unique | 275 | 140 | 207 |
| hsa-miR-4448           | mature_unique | 275 | 140 | 207 |
| hsa-miR-138-5p         | mature_unique | 172 | 209 | 190 |
| hsa-miR-337-3p         | mature_unique | 172 | 209 | 190 |
| hsa-miR-107            | mature_unique | 137 | 244 | 191 |
| hsa-miR-30c-1-3p       | mature_unique | 137 | 244 | 191 |
| hsa-miR-22-5p          | mature_unique | 172 | 174 | 173 |
| hsa-miR-335-3p         | mature_unique | 172 | 174 | 173 |
| hsa-miR-127-5p         | mature_unique | 206 | 140 | 173 |
| hsa-miR-382-5p         | mature_unique | 172 | 140 | 156 |
| hsa-miR-503            | mature_unique | 172 | 140 | 156 |
| hsa-miR-708-3p         | mature_unique | 172 | 140 | 156 |
| hsa-miR-369-3p         | mature_unique | 137 | 140 | 138 |
| hsa-miR-433            | mature_unique | 137 | 140 | 138 |
| hsa-miR-328            | mature_unique | 584 | 0   | 292 |
| hsa-miR-454-3p         | mature_unique | 0   | 419 | 209 |
| hsa-miR-409-5p         | mature_unique | 0   | 349 | 174 |
| hsa-miR-548o-3p        | mature_unique | 0   | 314 | 157 |
| hsa-miR-1185-1-3p      | mature_unique | 309 | 0   | 155 |
| hsa-miR-196b-5p        | mature_unique | 275 | 0   | 137 |
| hsa-miR-664-3p         | mature_unique | 275 | 0   | 137 |
| hsa-miR-548g-5p#hsa-rr | mature_unique | 0   | 244 | 122 |
| hsa-miR-138-1-3p       | mature_unique | 240 | 0   | 120 |
| hsa-let-7a-3p          | mature_unique | 0   | 209 | 105 |
| hsa-miR-24-2-5p        | mature_unique | 0   | 209 | 105 |
| hsa-miR-3152-5p        | mature_unique | 0   | 209 | 105 |
| hsa-miR-362-5p         | mature_unique | 0   | 209 | 105 |
| hsa-miR-374b-5p        | mature_unique | 0   | 209 | 105 |
| hsa-miR-136-5p         | mature_unique | 206 | 0   | 103 |
| hsa-miR-376a-3p        | mature_unique | 206 | 0   | 103 |
| hsa-miR-485-3p         | mature_unique | 206 | 0   | 103 |
| hsa-let-7f-2-3p        | mature_unique | 0   | 174 | 87  |
| hsa-miR-1180           | mature_unique | 0   | 174 | 87  |
| hsa-miR-190a           | mature_unique | 0   | 174 | 87  |

|                   |               |     |     |    |
|-------------------|---------------|-----|-----|----|
| hsa-miR-26a-2-3p  | mature_unique | 0   | 174 | 87 |
| hsa-miR-340-3p    | mature_unique | 0   | 174 | 87 |
| hsa-miR-3529-3p   | mature_unique | 0   | 174 | 87 |
| hsa-miR-377-3p    | mature_unique | 0   | 174 | 87 |
| hsa-miR-1271-5p   | mature_unique | 172 | 0   | 86 |
| hsa-miR-214-3p    | mature_unique | 172 | 0   | 86 |
| hsa-miR-34a-3p    | mature_unique | 172 | 0   | 86 |
| hsa-miR-561-5p    | mature_unique | 172 | 0   | 86 |
| hsa-miR-629-5p    | mature_unique | 172 | 0   | 86 |
| hsa-miR-656       | mature_unique | 172 | 0   | 86 |
| hsa-let-7f-1-3p   | mature_unique | 0   | 140 | 70 |
| hsa-miR-182-5p    | mature_unique | 0   | 140 | 70 |
| hsa-miR-29c-5p    | mature_unique | 0   | 140 | 70 |
| hsa-miR-454-5p    | mature_unique | 0   | 140 | 70 |
| hsa-miR-652-3p    | mature_unique | 0   | 140 | 70 |
| hsa-miR-668       | mature_unique | 0   | 140 | 70 |
| hsa-miR-93-3p     | mature_unique | 0   | 140 | 70 |
| hsa-miR-106b-5p   | mature_unique | 137 | 0   | 69 |
| hsa-miR-10b-3p    | mature_unique | 137 | 0   | 69 |
| hsa-miR-1246      | mature_unique | 137 | 0   | 69 |
| hsa-miR-1908      | mature_unique | 137 | 0   | 69 |
| hsa-miR-195-3p    | mature_unique | 137 | 0   | 69 |
| hsa-miR-2467-5p   | mature_unique | 137 | 0   | 69 |
| hsa-miR-25-5p     | mature_unique | 137 | 0   | 69 |
| hsa-miR-34c-5p    | mature_unique | 137 | 0   | 69 |
| hsa-miR-3615      | mature_unique | 137 | 0   | 69 |
| hsa-miR-4435      | mature_unique | 137 | 0   | 69 |
| hsa-miR-505-3p    | mature_unique | 137 | 0   | 69 |
| hsa-miR-671-5p    | mature_unique | 137 | 0   | 69 |
| hsa-miR-7-5p      | mature_unique | 137 | 0   | 69 |
| hsa-miR-99b-3p    | mature_unique | 137 | 0   | 69 |
| hsa-let-7a-2-3p   | mature_unique | 0   | 0   | 0  |
| hsa-let-7e-3p     | mature_unique | 0   | 0   | 0  |
| hsa-let-7g-3p     | mature_unique | 0   | 0   | 0  |
| hsa-let-7i-3p     | mature_unique | 0   | 0   | 0  |
| hsa-miR-101-5p    | mature_unique | 0   | 0   | 0  |
| hsa-miR-1185-2-3p | mature_unique | 0   | 0   | 0  |
| hsa-miR-1185-5p   | mature_unique | 0   | 0   | 0  |
| hsa-miR-1193      | mature_unique | 0   | 0   | 0  |
| hsa-miR-1197      | mature_unique | 0   | 0   | 0  |
| hsa-miR-1226-3p   | mature_unique | 0   | 0   | 0  |
| hsa-miR-1228-3p   | mature_unique | 0   | 0   | 0  |
| hsa-miR-1229      | mature_unique | 0   | 0   | 0  |
| hsa-miR-1237      | mature_unique | 0   | 0   | 0  |
| hsa-miR-1245b-3p  | mature_unique | 0   | 0   | 0  |
| hsa-miR-1249      | mature_unique | 0   | 0   | 0  |
| hsa-miR-1254      | mature_unique | 0   | 0   | 0  |

|                  |               |   |   |   |
|------------------|---------------|---|---|---|
| hsa-miR-1255a    | mature_unique | 0 | 0 | 0 |
| hsa-miR-1261     | mature_unique | 0 | 0 | 0 |
| hsa-miR-1268b    | mature_unique | 0 | 0 | 0 |
| hsa-miR-1269a    | mature_unique | 0 | 0 | 0 |
| hsa-miR-1270     | mature_unique | 0 | 0 | 0 |
| hsa-miR-1273g-3p | mature_unique | 0 | 0 | 0 |
| hsa-miR-1275     | mature_unique | 0 | 0 | 0 |
| hsa-miR-1276     | mature_unique | 0 | 0 | 0 |
| hsa-miR-1277-5p  | mature_unique | 0 | 0 | 0 |
| hsa-miR-1280     | mature_unique | 0 | 0 | 0 |
| hsa-miR-1285-3p  | mature_unique | 0 | 0 | 0 |
| hsa-miR-1285-5p  | mature_unique | 0 | 0 | 0 |
| hsa-miR-1287     | mature_unique | 0 | 0 | 0 |
| hsa-miR-1290     | mature_unique | 0 | 0 | 0 |
| hsa-miR-1293     | mature_unique | 0 | 0 | 0 |
| hsa-miR-1294     | mature_unique | 0 | 0 | 0 |
| hsa-miR-1301     | mature_unique | 0 | 0 | 0 |
| hsa-miR-1303     | mature_unique | 0 | 0 | 0 |
| hsa-miR-1306-5p  | mature_unique | 0 | 0 | 0 |
| hsa-miR-1323     | mature_unique | 0 | 0 | 0 |
| hsa-miR-132-5p   | mature_unique | 0 | 0 | 0 |
| hsa-miR-133a     | mature_unique | 0 | 0 | 0 |
| hsa-miR-1343     | mature_unique | 0 | 0 | 0 |
| hsa-miR-135b-3p  | mature_unique | 0 | 0 | 0 |
| hsa-miR-135b-5p  | mature_unique | 0 | 0 | 0 |
| hsa-miR-137      | mature_unique | 0 | 0 | 0 |
| hsa-miR-140-5p   | mature_unique | 0 | 0 | 0 |
| hsa-miR-141-3p   | mature_unique | 0 | 0 | 0 |
| hsa-miR-141-5p   | mature_unique | 0 | 0 | 0 |
| hsa-miR-142-5p   | mature_unique | 0 | 0 | 0 |
| hsa-miR-143-5p   | mature_unique | 0 | 0 | 0 |
| hsa-miR-145-3p   | mature_unique | 0 | 0 | 0 |
| hsa-miR-145-5p   | mature_unique | 0 | 0 | 0 |
| hsa-miR-1468     | mature_unique | 0 | 0 | 0 |
| hsa-miR-146b-3p  | mature_unique | 0 | 0 | 0 |
| hsa-miR-147b     | mature_unique | 0 | 0 | 0 |
| hsa-miR-148a-3p  | mature_unique | 0 | 0 | 0 |
| hsa-miR-148a-5p  | mature_unique | 0 | 0 | 0 |
| hsa-miR-148b-5p  | mature_unique | 0 | 0 | 0 |
| hsa-miR-153      | mature_unique | 0 | 0 | 0 |
| hsa-miR-1538     | mature_unique | 0 | 0 | 0 |
| hsa-miR-154-5p   | mature_unique | 0 | 0 | 0 |
| hsa-miR-15b-3p   | mature_unique | 0 | 0 | 0 |
| hsa-miR-16-2-3p  | mature_unique | 0 | 0 | 0 |
| hsa-miR-17-3p    | mature_unique | 0 | 0 | 0 |
| hsa-miR-181b-3p  | mature_unique | 0 | 0 | 0 |
| hsa-miR-183-3p   | mature_unique | 0 | 0 | 0 |

|                  |               |   |   |   |
|------------------|---------------|---|---|---|
| hsa-miR-184      | mature_unique | 0 | 0 | 0 |
| hsa-miR-185-3p   | mature_unique | 0 | 0 | 0 |
| hsa-miR-185-5p   | mature_unique | 0 | 0 | 0 |
| hsa-miR-188-3p   | mature_unique | 0 | 0 | 0 |
| hsa-miR-188-5p   | mature_unique | 0 | 0 | 0 |
| hsa-miR-18a-3p   | mature_unique | 0 | 0 | 0 |
| hsa-miR-18a-5p   | mature_unique | 0 | 0 | 0 |
| hsa-miR-190b     | mature_unique | 0 | 0 | 0 |
| hsa-miR-191-3p   | mature_unique | 0 | 0 | 0 |
| hsa-miR-193a-3p  | mature_unique | 0 | 0 | 0 |
| hsa-miR-193b-5p  | mature_unique | 0 | 0 | 0 |
| hsa-miR-194-3p   | mature_unique | 0 | 0 | 0 |
| hsa-miR-194-5p   | mature_unique | 0 | 0 | 0 |
| hsa-miR-196a-5p  | mature_unique | 0 | 0 | 0 |
| hsa-miR-196b-3p  | mature_unique | 0 | 0 | 0 |
| hsa-miR-199a-5p  | mature_unique | 0 | 0 | 0 |
| hsa-miR-199b-5p  | mature_unique | 0 | 0 | 0 |
| hsa-miR-200a-3p  | mature_unique | 0 | 0 | 0 |
| hsa-miR-200a-5p  | mature_unique | 0 | 0 | 0 |
| hsa-miR-200b-3p  | mature_unique | 0 | 0 | 0 |
| hsa-miR-200b-5p  | mature_unique | 0 | 0 | 0 |
| hsa-miR-200c-3p  | mature_unique | 0 | 0 | 0 |
| hsa-miR-203      | mature_unique | 0 | 0 | 0 |
| hsa-miR-204-5p   | mature_unique | 0 | 0 | 0 |
| hsa-miR-205-5p   | mature_unique | 0 | 0 | 0 |
| hsa-miR-210      | mature_unique | 0 | 0 | 0 |
| hsa-miR-2110     | mature_unique | 0 | 0 | 0 |
| hsa-miR-2116-3p  | mature_unique | 0 | 0 | 0 |
| hsa-miR-212-3p   | mature_unique | 0 | 0 | 0 |
| hsa-miR-212-5p   | mature_unique | 0 | 0 | 0 |
| hsa-miR-214-5p   | mature_unique | 0 | 0 | 0 |
| hsa-miR-215      | mature_unique | 0 | 0 | 0 |
| hsa-miR-218-1-3p | mature_unique | 0 | 0 | 0 |
| hsa-miR-218-5p   | mature_unique | 0 | 0 | 0 |
| hsa-miR-219-1-3p | mature_unique | 0 | 0 | 0 |
| hsa-miR-224-3p   | mature_unique | 0 | 0 | 0 |
| hsa-miR-2277-5p  | mature_unique | 0 | 0 | 0 |
| hsa-miR-2355-5p  | mature_unique | 0 | 0 | 0 |
| hsa-miR-296-3p   | mature_unique | 0 | 0 | 0 |
| hsa-miR-296-5p   | mature_unique | 0 | 0 | 0 |
| hsa-miR-299-5p   | mature_unique | 0 | 0 | 0 |
| hsa-miR-29a-5p   | mature_unique | 0 | 0 | 0 |
| hsa-miR-29b-1-5p | mature_unique | 0 | 0 | 0 |
| hsa-miR-302a-3p  | mature_unique | 0 | 0 | 0 |
| hsa-miR-302a-5p  | mature_unique | 0 | 0 | 0 |
| hsa-miR-302b-3p  | mature_unique | 0 | 0 | 0 |
| hsa-miR-302d-3p  | mature_unique | 0 | 0 | 0 |

|                 |               |   |   |   |
|-----------------|---------------|---|---|---|
| hsa-miR-30b-3p  | mature_unique | 0 | 0 | 0 |
| hsa-miR-30d-3p  | mature_unique | 0 | 0 | 0 |
| hsa-miR-3117-3p | mature_unique | 0 | 0 | 0 |
| hsa-miR-3120-3p | mature_unique | 0 | 0 | 0 |
| hsa-miR-3120-5p | mature_unique | 0 | 0 | 0 |
| hsa-miR-3127-5p | mature_unique | 0 | 0 | 0 |
| hsa-miR-3129-3p | mature_unique | 0 | 0 | 0 |
| hsa-miR-31-3p   | mature_unique | 0 | 0 | 0 |
| hsa-miR-3158-3p | mature_unique | 0 | 0 | 0 |
| hsa-miR-3161    | mature_unique | 0 | 0 | 0 |
| hsa-miR-3174    | mature_unique | 0 | 0 | 0 |
| hsa-miR-3176    | mature_unique | 0 | 0 | 0 |
| hsa-miR-3177-3p | mature_unique | 0 | 0 | 0 |
| hsa-miR-3180-3p | mature_unique | 0 | 0 | 0 |
| hsa-miR-3180-5p | mature_unique | 0 | 0 | 0 |
| hsa-miR-3195    | mature_unique | 0 | 0 | 0 |
| hsa-miR-3200-3p | mature_unique | 0 | 0 | 0 |
| hsa-miR-320b    | mature_unique | 0 | 0 | 0 |
| hsa-miR-320c    | mature_unique | 0 | 0 | 0 |
| hsa-miR-323a-5p | mature_unique | 0 | 0 | 0 |
| hsa-miR-32-3p   | mature_unique | 0 | 0 | 0 |
| hsa-miR-324-3p  | mature_unique | 0 | 0 | 0 |
| hsa-miR-324-5p  | mature_unique | 0 | 0 | 0 |
| hsa-miR-32-5p   | mature_unique | 0 | 0 | 0 |
| hsa-miR-326     | mature_unique | 0 | 0 | 0 |
| hsa-miR-329     | mature_unique | 0 | 0 | 0 |
| hsa-miR-330-3p  | mature_unique | 0 | 0 | 0 |
| hsa-miR-331-3p  | mature_unique | 0 | 0 | 0 |
| hsa-miR-331-5p  | mature_unique | 0 | 0 | 0 |
| hsa-miR-335-5p  | mature_unique | 0 | 0 | 0 |
| hsa-miR-337-5p  | mature_unique | 0 | 0 | 0 |
| hsa-miR-33a-3p  | mature_unique | 0 | 0 | 0 |
| hsa-miR-33a-5p  | mature_unique | 0 | 0 | 0 |
| hsa-miR-33b-3p  | mature_unique | 0 | 0 | 0 |
| hsa-miR-33b-5p  | mature_unique | 0 | 0 | 0 |
| hsa-miR-342-5p  | mature_unique | 0 | 0 | 0 |
| hsa-miR-34b-3p  | mature_unique | 0 | 0 | 0 |
| hsa-miR-34b-5p  | mature_unique | 0 | 0 | 0 |
| hsa-miR-3545-5p | mature_unique | 0 | 0 | 0 |
| hsa-miR-3605-5p | mature_unique | 0 | 0 | 0 |
| hsa-miR-3607-3p | mature_unique | 0 | 0 | 0 |
| hsa-miR-3607-5p | mature_unique | 0 | 0 | 0 |
| hsa-miR-3609    | mature_unique | 0 | 0 | 0 |
| hsa-miR-3613-5p | mature_unique | 0 | 0 | 0 |
| hsa-miR-3614-5p | mature_unique | 0 | 0 | 0 |
| hsa-miR-3620    | mature_unique | 0 | 0 | 0 |
| hsa-miR-363-3p  | mature_unique | 0 | 0 | 0 |

|                  |               |   |   |   |
|------------------|---------------|---|---|---|
| hsa-miR-365b-5p  | mature_unique | 0 | 0 | 0 |
| hsa-miR-3661     | mature_unique | 0 | 0 | 0 |
| hsa-miR-3677-3p  | mature_unique | 0 | 0 | 0 |
| hsa-miR-374b-3p  | mature_unique | 0 | 0 | 0 |
| hsa-miR-374c-5p  | mature_unique | 0 | 0 | 0 |
| hsa-miR-375      | mature_unique | 0 | 0 | 0 |
| hsa-miR-376a-5p  | mature_unique | 0 | 0 | 0 |
| hsa-miR-376b     | mature_unique | 0 | 0 | 0 |
| hsa-miR-378a-5p  | mature_unique | 0 | 0 | 0 |
| hsa-miR-380-3p   | mature_unique | 0 | 0 | 0 |
| hsa-miR-382-3p   | mature_unique | 0 | 0 | 0 |
| hsa-miR-3928     | mature_unique | 0 | 0 | 0 |
| hsa-miR-3929     | mature_unique | 0 | 0 | 0 |
| hsa-miR-3934     | mature_unique | 0 | 0 | 0 |
| hsa-miR-3938     | mature_unique | 0 | 0 | 0 |
| hsa-miR-3939     | mature_unique | 0 | 0 | 0 |
| hsa-miR-3960     | mature_unique | 0 | 0 | 0 |
| hsa-miR-425-3p   | mature_unique | 0 | 0 | 0 |
| hsa-miR-4284     | mature_unique | 0 | 0 | 0 |
| hsa-miR-4286     | mature_unique | 0 | 0 | 0 |
| hsa-miR-429      | mature_unique | 0 | 0 | 0 |
| hsa-miR-431-3p   | mature_unique | 0 | 0 | 0 |
| hsa-miR-432-3p   | mature_unique | 0 | 0 | 0 |
| hsa-miR-4326     | mature_unique | 0 | 0 | 0 |
| hsa-miR-4443     | mature_unique | 0 | 0 | 0 |
| hsa-miR-4454     | mature_unique | 0 | 0 | 0 |
| hsa-miR-4461     | mature_unique | 0 | 0 | 0 |
| hsa-miR-4466     | mature_unique | 0 | 0 | 0 |
| hsa-miR-4485     | mature_unique | 0 | 0 | 0 |
| hsa-miR-4497     | mature_unique | 0 | 0 | 0 |
| hsa-miR-449a     | mature_unique | 0 | 0 | 0 |
| hsa-miR-449c-5p  | mature_unique | 0 | 0 | 0 |
| hsa-miR-4501     | mature_unique | 0 | 0 | 0 |
| hsa-miR-4508     | mature_unique | 0 | 0 | 0 |
| hsa-miR-4511     | mature_unique | 0 | 0 | 0 |
| hsa-miR-4521     | mature_unique | 0 | 0 | 0 |
| hsa-miR-452-3p   | mature_unique | 0 | 0 | 0 |
| hsa-miR-4634     | mature_unique | 0 | 0 | 0 |
| hsa-miR-4661-5p  | mature_unique | 0 | 0 | 0 |
| hsa-miR-4662a-5p | mature_unique | 0 | 0 | 0 |
| hsa-miR-4728-3p  | mature_unique | 0 | 0 | 0 |
| hsa-miR-4746-5p  | mature_unique | 0 | 0 | 0 |
| hsa-miR-4775     | mature_unique | 0 | 0 | 0 |
| hsa-miR-4781-3p  | mature_unique | 0 | 0 | 0 |
| hsa-miR-4791     | mature_unique | 0 | 0 | 0 |
| hsa-miR-4792     | mature_unique | 0 | 0 | 0 |
| hsa-miR-4804-5p  | mature_unique | 0 | 0 | 0 |

|                   |               |   |   |   |
|-------------------|---------------|---|---|---|
| hsa-miR-486-3p    | mature_unique | 0 | 0 | 0 |
| hsa-miR-487a      | mature_unique | 0 | 0 | 0 |
| hsa-miR-490-3p    | mature_unique | 0 | 0 | 0 |
| hsa-miR-491-5p    | mature_unique | 0 | 0 | 0 |
| hsa-miR-493-3p    | mature_unique | 0 | 0 | 0 |
| hsa-miR-493-5p    | mature_unique | 0 | 0 | 0 |
| hsa-miR-494       | mature_unique | 0 | 0 | 0 |
| hsa-miR-495       | mature_unique | 0 | 0 | 0 |
| hsa-miR-496       | mature_unique | 0 | 0 | 0 |
| hsa-miR-500a-5p   | mature_unique | 0 | 0 | 0 |
| hsa-miR-5010-3p   | mature_unique | 0 | 0 | 0 |
| hsa-miR-501-5p    | mature_unique | 0 | 0 | 0 |
| hsa-miR-502-3p    | mature_unique | 0 | 0 | 0 |
| hsa-miR-532-3p    | mature_unique | 0 | 0 | 0 |
| hsa-miR-539-3p    | mature_unique | 0 | 0 | 0 |
| hsa-miR-539-5p    | mature_unique | 0 | 0 | 0 |
| hsa-miR-541-3p    | mature_unique | 0 | 0 | 0 |
| hsa-miR-541-5p    | mature_unique | 0 | 0 | 0 |
| hsa-miR-542-5p    | mature_unique | 0 | 0 | 0 |
| hsa-miR-543       | mature_unique | 0 | 0 | 0 |
| hsa-miR-548ah-3p  | mature_unique | 0 | 0 | 0 |
| hsa-miR-548e      | mature_unique | 0 | 0 | 0 |
| hsa-miR-548f      | mature_unique | 0 | 0 | 0 |
| hsa-miR-550a-3p   | mature_unique | 0 | 0 | 0 |
| hsa-miR-550a-5p   | mature_unique | 0 | 0 | 0 |
| hsa-miR-550b-2-5p | mature_unique | 0 | 0 | 0 |
| hsa-miR-5585-3p   | mature_unique | 0 | 0 | 0 |
| hsa-miR-5683      | mature_unique | 0 | 0 | 0 |
| hsa-miR-5684      | mature_unique | 0 | 0 | 0 |
| hsa-miR-5699      | mature_unique | 0 | 0 | 0 |
| hsa-miR-5701      | mature_unique | 0 | 0 | 0 |
| hsa-miR-576-3p    | mature_unique | 0 | 0 | 0 |
| hsa-miR-576-5p    | mature_unique | 0 | 0 | 0 |
| hsa-miR-577       | mature_unique | 0 | 0 | 0 |
| hsa-miR-580       | mature_unique | 0 | 0 | 0 |
| hsa-miR-582-5p    | mature_unique | 0 | 0 | 0 |
| hsa-miR-585       | mature_unique | 0 | 0 | 0 |
| hsa-miR-589-3p    | mature_unique | 0 | 0 | 0 |
| hsa-miR-590-3p    | mature_unique | 0 | 0 | 0 |
| hsa-miR-598       | mature_unique | 0 | 0 | 0 |
| hsa-miR-615-3p    | mature_unique | 0 | 0 | 0 |
| hsa-miR-615-5p    | mature_unique | 0 | 0 | 0 |
| hsa-miR-616-5p    | mature_unique | 0 | 0 | 0 |
| hsa-miR-625-3p    | mature_unique | 0 | 0 | 0 |
| hsa-miR-625-5p    | mature_unique | 0 | 0 | 0 |
| hsa-miR-627       | mature_unique | 0 | 0 | 0 |
| hsa-miR-628-3p    | mature_unique | 0 | 0 | 0 |

|                         |                 |         |         |   |
|-------------------------|-----------------|---------|---------|---|
| hsa-miR-628-5p          | mature_unique   | 0       | 0       | 0 |
| hsa-miR-629-3p          | mature_unique   | 0       | 0       | 0 |
| hsa-miR-641             | mature_unique   | 0       | 0       | 0 |
| hsa-miR-644b-3p         | mature_unique   | 0       | 0       | 0 |
| hsa-miR-651             | mature_unique   | 0       | 0       | 0 |
| hsa-miR-655             | mature_unique   | 0       | 0       | 0 |
| hsa-miR-659-5p          | mature_unique   | 0       | 0       | 0 |
| hsa-miR-664-5p          | mature_unique   | 0       | 0       | 0 |
| hsa-miR-708-5p          | mature_unique   | 0       | 0       | 0 |
| hsa-miR-7-1-3p          | mature_unique   | 0       | 0       | 0 |
| hsa-miR-744-3p          | mature_unique   | 0       | 0       | 0 |
| hsa-miR-760             | mature_unique   | 0       | 0       | 0 |
| hsa-miR-766-3p          | mature_unique   | 0       | 0       | 0 |
| hsa-miR-769-3p          | mature_unique   | 0       | 0       | 0 |
| hsa-miR-770-5p          | mature_unique   | 0       | 0       | 0 |
| hsa-miR-873-3p          | mature_unique   | 0       | 0       | 0 |
| hsa-miR-873-5p          | mature_unique   | 0       | 0       | 0 |
| hsa-miR-877-5p          | mature_unique   | 0       | 0       | 0 |
| hsa-miR-891a            | mature_unique   | 0       | 0       | 0 |
| hsa-miR-92a-1-5p        | mature_unique   | 0       | 0       | 0 |
| hsa-miR-92b-5p          | mature_unique   | 0       | 0       | 0 |
| hsa-miR-937             | mature_unique   | 0       | 0       | 0 |
| hsa-miR-940             | mature_unique   | 0       | 0       | 0 |
| hsa-miR-942             | mature_unique   | 0       | 0       | 0 |
| hsa-miR-9-5p            | mature_unique   | 0       | 0       | 0 |
| hsa-miR-96-5p           | mature_unique   | 0       | 0       | 0 |
| hsa-miR-99a-3p          | mature_unique   | 0       | 0       | 0 |
| aca-miR-10c             | maturehomolog_u | 0       | 0       |   |
| aly-miR161.1            | maturehomolog_u | 0       | 0       |   |
| ath-miR5658             | maturehomolog_u | 0       | 0       |   |
| bfl-let-7b#rno-miR-3596 | maturehomolog_u | 59,543  | 70,622  |   |
| bfl-miR-125b#rno-miR-3  | maturehomolog_u | 26,578  | 26,017  |   |
| bfl-miR-29a*            | maturehomolog_u | 0       | 0       |   |
| bmo-miR-2779            | maturehomolog_u | 378     | 174     |   |
| bmo-miR-2780a*          | maturehomolog_u | 0       | 0       |   |
| bmo-miR-2842            | maturehomolog_u | 0       | 0       |   |
| bta-miR-1434*           | maturehomolog_u | 0       | 0       |   |
| bta-miR-1940            | maturehomolog_u | 0       | 0       |   |
| bta-miR-2340            | maturehomolog_u | 54,358  | 30,202  |   |
| bta-miR-2354            | maturehomolog_u | 0       | 0       |   |
| bta-miR-2404            | maturehomolog_u | 0       | 0       |   |
| bta-miR-2478            | maturehomolog_u | 2,953   | 1,779   |   |
| bta-miR-2484            | maturehomolog_u | 0       | 0       |   |
| bta-miR-2487            | maturehomolog_u | 275     | 209     |   |
| bta-miR-26c             | maturehomolog_u | 177,530 | 200,775 |   |
| bta-miR-2887            | maturehomolog_u | 0       | 0       |   |
| bta-miR-2889            | maturehomolog_u | 1,889   | 1,674   |   |



|                        |                  |           |           |
|------------------------|------------------|-----------|-----------|
| bta-miR-2898           | maturehomolog_ui | 2,198     | 1,325     |
| bta-miR-2904           | maturehomolog_ui | 0         | 0         |
| bta-miR-2957           | maturehomolog_ui | 0         | 0         |
| bta-miR-3578           | maturehomolog_ui | 0         | 0         |
| bta-miR-3596           | maturehomolog_ui | 40,107    | 41,745    |
| bta-miR-3600           | maturehomolog_ui | 1,129,014 | 1,125,660 |
| bta-miR-3601           | maturehomolog_ui | 0         | 0         |
| bta-miR-3604           | maturehomolog_ui | 2,919     | 2,755     |
| bta-miR-669            | maturehomolog_ui | 2,472     | 2,720     |
| cel-miR-39-3p          | maturehomolog_ui | 0         | 0         |
| cfa-miR-1839#mmu-miF   | maturehomolog_ui | 0         | 209       |
| cfa-miR-1843           | maturehomolog_ui | 0         | 0         |
| cin-miR-3575-5p        | maturehomolog_ui | 0         | 0         |
| cin-miR-4185-3p        | maturehomolog_ui | 0         | 0         |
| dme-miR-10-3p#bmo-m    | maturehomolog_ui | 32,931    | 43,071    |
| dme-miR-10-5p#aae-mi   | maturehomolog_ui | 378       | 349       |
| dme-miR-4949-5p        | maturehomolog_ui | 0         | 0         |
| dme-miR-4951-5p        | maturehomolog_ui | 0         | 0         |
| dme-miR-979-5p         | maturehomolog_ui | 0         | 0         |
| dre-miR-125a#fru-miR-1 | maturehomolog_ui | 0         | 0         |
| dre-miR-27e#fru-miR-27 | maturehomolog_ui | 0         | 0         |
| ebv-miR-BART10*        | maturehomolog_ui | 0         | 0         |
| eca-miR-199a-3p        | maturehomolog_ui | 0         | 0         |
| gga-miR-1565           | maturehomolog_ui | 0         | 0         |
| gga-miR-1622           | maturehomolog_ui | 0         | 0         |
| gga-miR-1692           | maturehomolog_ui | 172       | 0         |
| gga-miR-1816           | maturehomolog_ui | 206       | 279       |
| gga-miR-3535           | maturehomolog_ui | 0         | 140       |
| gma-miR1520h           | maturehomolog_ui | 0         | 0         |
| hcmv-miR-US25-1*       | maturehomolog_ui | 0         | 0         |
| hsv1-miR-H17           | maturehomolog_ui | 137       | 0         |
| mdo-miR-151            | maturehomolog_ui | 0         | 0         |
| mmu-miR-1195           | maturehomolog_ui | 0         | 0         |
| mmu-miR-1839-3p        | maturehomolog_ui | 0         | 0         |
| mmu-miR-1843-3p        | maturehomolog_ui | 0         | 0         |
| mmu-miR-1843-5p        | maturehomolog_ui | 0         | 0         |
| mmu-miR-1957           | maturehomolog_ui | 0         | 0         |
| mmu-miR-1983           | maturehomolog_ui | 0         | 244       |
| mmu-miR-2137           | maturehomolog_ui | 1,408     | 1,151     |
| mmu-miR-300-3p#rno-r   | maturehomolog_ui | 0         | 0         |
| mmu-miR-3071-3p        | maturehomolog_ui | 0         | 0         |
| mmu-miR-3096-5p        | maturehomolog_ui | 5,391     | 5,824     |
| mmu-miR-3096b-5p       | maturehomolog_ui | 5,219     | 5,162     |
| mmu-miR-3963           | maturehomolog_ui | 0         | 0         |
| mmu-miR-3968           | maturehomolog_ui | 0         | 0         |
| mmu-miR-5097           | maturehomolog_ui | 1,614     | 1,709     |
| mmu-miR-5105           | maturehomolog_ui | 0         | 0         |

|                                          |                  |        |        |
|------------------------------------------|------------------|--------|--------|
| mmu-miR-5106                             | maturehomolog_ui | 0      | 0      |
| mmu-miR-5109                             | maturehomolog_ui | 0      | 0      |
| mmu-miR-5115                             | maturehomolog_ui | 19,710 | 17,368 |
| mmu-miR-5119                             | maturehomolog_ui | 0      | 0      |
| mmu-miR-5124                             | maturehomolog_ui | 0      | 0      |
| mne-miR-140                              | maturehomolog_ui | 0      | 0      |
| oan-miR-1357                             | maturehomolog_ui | 0      | 0      |
| oan-miR-1386                             | maturehomolog_ui | 1,030  | 488    |
| oar-miR-3955-5p                          | maturehomolog_ui | 0      | 0      |
| oar-miR-654-3p                           | maturehomolog_ui | 0      | 0      |
| pma-let-7b                               | maturehomolog_ui | 0      | 0      |
| rno-miR-218b                             | maturehomolog_ui | 0      | 0      |
| rno-miR-3548                             | maturehomolog_ui | 0      | 0      |
| rno-miR-3549                             | maturehomolog_ui | 412    | 593    |
| rno-miR-3553                             | maturehomolog_ui | 2,335  | 279    |
| rno-miR-3554                             | maturehomolog_ui | 0      | 0      |
| rno-miR-3556a                            | maturehomolog_ui | 0      | 0      |
| rno-miR-3556b                            | maturehomolog_ui | 1,202  | 977    |
| rno-miR-3557-3p                          | maturehomolog_ui | 0      | 0      |
| rno-miR-3557-5p                          | maturehomolog_ui | 3,400  | 3,069  |
| rno-miR-3560                             | maturehomolog_ui | 0      | 0      |
| rno-miR-3570                             | maturehomolog_ui | 7,726  | 6,975  |
| rno-miR-3574                             | maturehomolog_ui | 0      | 0      |
| rno-miR-3576                             | maturehomolog_ui | 0      | 0      |
| rno-miR-3578                             | maturehomolog_ui | 996    | 558    |
| rno-miR-3581                             | maturehomolog_ui | 35,575 | 36,584 |
| rno-miR-3586-3p                          | maturehomolog_ui | 39,077 | 42,548 |
| rno-miR-3587                             | maturehomolog_ui | 721    | 209    |
| rno-miR-3589                             | maturehomolog_ui | 0      | 0      |
| rno-miR-3590-5p                          | maturehomolog_ui | 927    | 1,604  |
| rno-miR-3592                             | maturehomolog_ui | 0      | 0      |
| rno-miR-3596b                            | maturehomolog_ui | 8,413  | 10,637 |
| rno-miR-3596c                            | maturehomolog_ui | 4,086  | 3,522  |
| rno-miR-3596d                            | maturehomolog_ui | 961    | 907    |
| sha-miR-716b                             | maturehomolog_ui | 0      | 0      |
| spu-miR-10                               | maturehomolog_ui | 0      | 0      |
| spu-miR-183                              | maturehomolog_ui | 446    | 0      |
| ssc-miR-1285                             | maturehomolog_ui | 0      | 0      |
| ssc-miR-2476                             | maturehomolog_ui | 15,212 | 9,242  |
| ssc-miR-4332                             | maturehomolog_ui | 0      | 0      |
| tca-miR-100-5p                           | maturehomolog_ui | 5,185  | 7,847  |
| xbo-miR-92b                              | maturehomolog_ui | 0      | 0      |
| xtr-miR-143#mdo-miR-1                    | maturehomolog_ui | 0      | 0      |
| chr10_104196265_1041newMicroRNA_fast     |                  | 0      | 0      |
| chr10_112748688_1127newMicroRNA_fast     |                  | 0      | 0      |
| chr1_155164977_155164977newMicroRNA_fast |                  | 0      | 0      |
| chr11_79113065_79113065newMicroRNA_fast  |                  | 0      | 0      |

|                                       |         |         |
|---------------------------------------|---------|---------|
| chr12_7073264_707335newMicroRNA_fast  | 0       | 0       |
| chr12_95702206_95702newMicroRNA_fast  | 0       | 0       |
| chr14_100576000_1005newMicroRNA_fast  | 0       | 0       |
| chr14_101506560_1015newMicroRNA_fast  | 0       | 0       |
| chr1_41220031_412201newMicroRNA_fast  | 0       | 0       |
| chr16_33962707_33962newMicroRNA_fast  | 0       | 0       |
| chr16_33963387_33963newMicroRNA_fast  | 0       | 0       |
| chr16_33965496_33965newMicroRNA_fast  | 0       | 0       |
| chr16_69966995_69967newMicroRNA_fast  | 0       | 0       |
| chr17_1953572_195365newMicroRNA_fast  | 0       | 0       |
| chr17_29902447_29902newMicroRNA_fast  | 0       | 0       |
| chr17_46709847_46709newMicroRNA_fast  | 0       | 0       |
| chr17_57918623_57918newMicroRNA_fast  | 601,644 | 643,130 |
| chr19_13947249_13947newMicroRNA_fast  | 45,739  | 41,745  |
| chr19_13947397_13947newMicroRNA_fast  | 0       | 0       |
| chr19_46142253_46142newMicroRNA_fast  | 0       | 0       |
| chr19_52195858_52195newMicroRNA_fast  | 0       | 86,804  |
| chr19_52196510_52196newMicroRNA_fast  | 0       | 0       |
| chr2_133011966_13301newMicroRNA_fast  | 0       | 0       |
| chr21_9827213_982731newMicroRNA_fast  | 0       | 0       |
| chr22_22007594_22007newMicroRNA_fast  | 1,751   | 2,685   |
| chr3_160122530_16012newMicroRNA_fast  | 0       | 36,933  |
| chr3_188406570_18840newMicroRNA_fast  | 71,905  | 57,823  |
| chr3_44155715_441557newMicroRNA_fast  | 0       | 0       |
| chr3_49057581_490576newMicroRNA_fast  | 0       | 0       |
| chr5_136983259_13698newMicroRNA_fast  | 3,812   | 0       |
| chr5_148808497_14880newMicroRNA_fast  | 0       | 0       |
| chr5_180670301_18067newMicroRNA_fast  | 0       | 0       |
| chr5_63935990_639360newMicroRNA_fast  | 0       | 0       |
| chr6_72113245_721133newMicroRNA_fast  | 206,992 | 159,693 |
| chr7_1062580_1062663newMicroRNA_fast  | 0       | 0       |
| chr7_130135957_13013newMicroRNA_fast  | 0       | 0       |
| chr7_5535454_5535536newMicroRNA_fast  | 0       | 0       |
| chr7_99691614_996916newMicroRNA_fast  | 790     | 698     |
| chr9_116971718_11697newMicroRNA_fast  | 0       | 0       |
| chr9_28888875_2888889newMicroRNA_fast | 0       | 0       |
| chr9_97847733_978478newMicroRNA_fast  | 140,959 | 142,395 |
| chrX_133680663_13368newMicroRNA_fast  | 824     | 1,186   |
| chrX_151127045_15112newMicroRNA_fast  | 0       | 0       |
| chrX_45606427_456065newMicroRNA_fast  | 0       | 0       |
| chrX_49767761_497678newMicroRNA_fast  | 0       | 0       |
| chrX_49773039_497731newMicroRNA_fast  | 0       | 0       |
| chrX_85158633_851587newMicroRNA_fast  | 0       | 0       |
| chr1_1103247_1103329newMicroRNA_fast  | 0       | 0       |
| chr1_172113682_17211newMicroRNA_fast  | 0       | 0       |
| chr1_198828187_19882newMicroRNA_fast  | 0       | 0       |
| chr14_101351040_1013newMicroRNA_fast  | 0       | 0       |

|                      |                  |           |           |
|----------------------|------------------|-----------|-----------|
| chr14_101531641_1015 | newMicroRNA_fast | 0         | 0         |
| chr17_1617196_161727 | newMicroRNA_fast | 1,131,452 | 1,129,183 |
| chr17_46114527_46114 | newMicroRNA_fast | 0         | 0         |
| chr19_10928094_10928 | newMicroRNA_fast | 0         | 0         |
| chr19_52196034_52196 | newMicroRNA_fast | 0         | 0         |
| chr21_17962563_17962 | newMicroRNA_fast | 28,776    | 29,365    |
| chr5_149112382_14911 | newMicroRNA_fast | 0         | 0         |
| chr7_129414757_12941 | newMicroRNA_fast | 0         | 0         |
| chr7_25989530_259896 | newMicroRNA_fast | 0         | 0         |
| chr8_141742674_14174 | newMicroRNA_fast | 0         | 0         |
| chr9_131007013_13100 | newMicroRNA_fast | 0         | 0         |
| chr9_139565057_13956 | newMicroRNA_fast | 941,252   | 957,981   |
| chr9_21512108_215121 | newMicroRNA_fast | 0         | 0         |
| chr10_104196261_1041 | newMicroRNA_gen  | 0         | 0         |
| chr10_105154015_1051 | newMicroRNA_gen  | 1,236     | 1,081     |
| chr10_112748666_1127 | newMicroRNA_gen  | 0         | 0         |
| chr10_127955369_1279 | newMicroRNA_gen  | 0         | 0         |
| chr10_3448775_344887 | newMicroRNA_gen  | 687       | 0         |
| chr10_43966646_43966 | newMicroRNA_gen  | 0         | 0         |
| chr10_53059306_53059 | newMicroRNA_gen  | 0         | 0         |
| chr10_65132695_65132 | newMicroRNA_gen  | 275       | 314       |
| chr10_80220245_80220 | newMicroRNA_gen  | 0         | 0         |
| chr1_110141500_11014 | newMicroRNA_gen  | 0         | 0         |
| chr1_1102460_1102598 | newMicroRNA_gen  | 0         | 0         |
| chr1_1104368_1104482 | newMicroRNA_gen  | 0         | 0         |
| chr11_10530692_10530 | newMicroRNA_gen  | 137       | 0         |
| chr11_111383634_1113 | newMicroRNA_gen  | 0         | 0         |
| chr11_121970436_1219 | newMicroRNA_gen  | 0         | 0         |
| chr11_122022907_1220 | newMicroRNA_gen  | 0         | 0         |
| chr11_122026867_1220 | newMicroRNA_gen  | 0         | 0         |
| chr1_117637236_11763 | newMicroRNA_gen  | 0         | 0         |
| chr1_118397398_11839 | newMicroRNA_gen  | 0         | 0         |
| chr1_118806993_11880 | newMicroRNA_gen  | 0         | 0         |
| chr1_120543860_12054 | newMicroRNA_gen  | 0         | 0         |
| chr11_43602928_43603 | newMicroRNA_gen  | 0         | 0         |
| chr11_45848163_45848 | newMicroRNA_gen  | 0         | 0         |
| chr11_45874434_45874 | newMicroRNA_gen  | 0         | 0         |
| chr1_145966385_14596 | newMicroRNA_gen  | 0         | 0         |
| chr1_147508119_14750 | newMicroRNA_gen  | 0         | 0         |
| chr11_47869807_47869 | newMicroRNA_gen  | 0         | 0         |
| chr1_155164947_15516 | newMicroRNA_gen  | 0         | 0         |
| chr11_568085_568197  | newMicroRNA_gen  | 0         | 0         |
| chr11_62439578_62439 | newMicroRNA_gen  | 0         | 0         |
| chr11_64109289_64109 | newMicroRNA_gen  | 0         | 0         |
| chr11_64658593_64658 | newMicroRNA_gen  | 3,022     | 2,302     |
| chr11_7110791_711092 | newMicroRNA_gen  | 0         | 0         |
| chr1_172113677_17211 | newMicroRNA_gen  | 0         | 0         |

|                       |                 |        |         |
|-----------------------|-----------------|--------|---------|
| chr11_72326075_72326  | newMicroRNA_gen | 172    | 140     |
| chr11_75491727_75491  | newMicroRNA_gen | 0      | 0       |
| chr11_79113041_79113  | newMicroRNA_gen | 0      | 0       |
| chr11_85195141_85195  | newMicroRNA_gen | 0      | 0       |
| chr1_19275977_192761  | newMicroRNA_gen | 137    | 140     |
| chr11_93466816_93466  | newMicroRNA_gen | 652    | 349     |
| chr1_198828000_19882  | newMicroRNA_gen | 0      | 0       |
| chr1_205417408_20541  | newMicroRNA_gen | 0      | 0       |
| chr1_211790254_21179  | newMicroRNA_gen | 0      | 0       |
| chr12_13041564_13041  | newMicroRNA_gen | 0      | 0       |
| chr1_216676340_21667  | newMicroRNA_gen | 0      | 0       |
| chr1_220291180_22029  | newMicroRNA_gen | 0      | 0       |
| chr1_231107852_23110  | newMicroRNA_gen | 0      | 0       |
| chr12_33049851_33049  | newMicroRNA_gen | 0      | 0       |
| chr1_23346245_23346   | newMicroRNA_gen | 0      | 0       |
| chr1_237766470_23776  | newMicroRNA_gen | 0      | 0       |
| chr1_243509449_24350  | newMicroRNA_gen | 137    | 523     |
| chr12_54385511_54385  | newMicroRNA_gen | 0      | 0       |
| chr12_54427716_54427  | newMicroRNA_gen | 0      | 0       |
| chr1_26437932_26438   | newMicroRNA_gen | 0      | 0       |
| chr12_6438764_64388   | newMicroRNA_gen | 0      | 0       |
| chr12_7073247_70733   | newMicroRNA_gen | 0      | 0       |
| chr12_755678_755820   | newMicroRNA_gen | 0      | 0       |
| chr12_95702208_95702  | newMicroRNA_gen | 0      | 0       |
| chr13_110889341_11088 | newMicroRNA_gen | 0      | 0       |
| chr13_114897987_11489 | newMicroRNA_gen | 0      | 0       |
| chr13_33161253_33161  | newMicroRNA_gen | 0      | 0       |
| chr13_37006270_37006  | newMicroRNA_gen | 0      | 0       |
| chr13_50570524_50570  | newMicroRNA_gen | 0      | 0       |
| chr1_35247462_35247   | newMicroRNA_gen | 0      | 0       |
| chr13_78756986_78757  | newMicroRNA_gen | 0      | 0       |
| chr1_38274304_38274   | newMicroRNA_gen | 0      | 0       |
| chr13_92002851_92002  | newMicroRNA_gen | 0      | 0       |
| chr13_92003137_92003  | newMicroRNA_gen | 275    | 0       |
| chr13_92003419_92003  | newMicroRNA_gen | 1,064  | 1,465   |
| chr14_100575973_10057 | newMicroRNA_gen | 0      | 802     |
| chr14_101340812_10134 | newMicroRNA_gen | 172    | 0       |
| chr14_101349303_10134 | newMicroRNA_gen | 0      | 537,145 |
| chr14_101377442_10137 | newMicroRNA_gen | 0      | 0       |
| chr14_101488372_10148 | newMicroRNA_gen | 0      | 488     |
| chr14_101489636_10148 | newMicroRNA_gen | 50,581 | 42,722  |
| chr14_101490104_10149 | newMicroRNA_gen | 0      | 0       |
| chr14_101495955_10149 | newMicroRNA_gen | 0      | 0       |
| chr14_101500088_10150 | newMicroRNA_gen | 0      | 0       |
| chr14_101505991_10150 | newMicroRNA_gen | 0      | 0       |
| chr14_101506543_10150 | newMicroRNA_gen | 19,024 | 26,121  |
| chr14_101512223_10151 | newMicroRNA_gen | 16,723 | 14,508  |

|                                     |         |         |
|-------------------------------------|---------|---------|
| chr14_101518769_1015newMicroRNA_gen | 0       | 0       |
| chr14_101521005_1015newMicroRNA_gen | 0       | 0       |
| chr1_41220027_412201newMicroRNA_gen | 1,992   | 13,601  |
| chr1_45244022_452441newMicroRNA_gen | 0       | 0       |
| chr14_61189434_61189newMicroRNA_gen | 0       | 0       |
| chr15_21145550_21145newMicroRNA_gen | 0       | 0       |
| chr15_22156735_22156newMicroRNA_gen | 0       | 0       |
| chr15_40443830_40443newMicroRNA_gen | 0       | 0       |
| chr15_57842353_57842newMicroRNA_gen | 0       | 0       |
| chr15_59463361_59463newMicroRNA_gen | 0       | 0       |
| chr1_566054_566190 newMicroRNA_gen  | 0       | 0       |
| chr15_70371710_70371newMicroRNA_gen | 0       | 0       |
| chr15_79502104_79502newMicroRNA_gen | 0       | 0       |
| chr16_1064097_106419newMicroRNA_gen | 0       | 0       |
| chr16_14397802_14397newMicroRNA_gen | 0       | 0       |
| chr16_14403132_14403newMicroRNA_gen | 0       | 0       |
| chr16_15024659_15024newMicroRNA_gen | 0       | 0       |
| chr16_15737153_15737newMicroRNA_gen | 0       | 0       |
| chr16_16423144_16423newMicroRNA_gen | 0       | 0       |
| chr16_18473188_18473newMicroRNA_gen | 0       | 0       |
| chr16_33963800_33964newMicroRNA_gen | 1,545   | 1,500   |
| chr16_33964202_33964newMicroRNA_gen | 0       | 0       |
| chr16_33965481_33965newMicroRNA_gen | 0       | 0       |
| chr1_65524089_655242newMicroRNA_gen | 1,854   | 942     |
| chr16_56892398_56892newMicroRNA_gen | 240     | 140     |
| chr16_67236199_67236newMicroRNA_gen | 0       | 0       |
| chr16_69364733_69364newMicroRNA_gen | 0       | 0       |
| chr16_69599681_69599newMicroRNA_gen | 0       | 0       |
| chr16_69966992_69967newMicroRNA_gen | 2,919   | 3,278   |
| chr1_67094100_670942newMicroRNA_gen | 0       | 0       |
| chr16_88997900_88998newMicroRNA_gen | 0       | 0       |
| chr17_11985205_11985newMicroRNA_gen | 0       | 0       |
| chr17_1359512_135961newMicroRNA_gen | 0       | 0       |
| chr17_1374411_137455newMicroRNA_gen | 0       | 0       |
| chr17_16343320_16343newMicroRNA_gen | 0       | 0       |
| chr17_1953182_195332newMicroRNA_gen | 378     | 174     |
| chr17_1953558_195367newMicroRNA_gen | 0       | 0       |
| chr17_29902439_29902newMicroRNA_gen | 0       | 0       |
| chr17_35000741_35000newMicroRNA_gen | 0       | 0       |
| chr17_46006666_46006newMicroRNA_gen | 0       | 0       |
| chr17_46657186_46657newMicroRNA_gen | 0       | 0       |
| chr17_46709825_46709newMicroRNA_gen | 0       | 0       |
| chr17_56408572_56408newMicroRNA_gen | 0       | 0       |
| chr17_57228479_57228newMicroRNA_gen | 0       | 0       |
| chr17_57918586_57918newMicroRNA_gen | 601,644 | 643,130 |
| chr17_6920916_692103newMicroRNA_gen | 584     | 837     |
| chr17_6921234_692134newMicroRNA_gen | 515     | 558     |

|                                     |        |        |
|-------------------------------------|--------|--------|
| chr17_7126587_712672newMicroRNA_gen | 0      | 0      |
| chr17_72999587_72999newMicroRNA_gen | 0      | 0      |
| chr17_75158269_75158newMicroRNA_gen | 0      | 0      |
| chr17_76793813_76793newMicroRNA_gen | 0      | 0      |
| chr1_78426054_784261newMicroRNA_gen | 0      | 0      |
| chr18_23670078_23670newMicroRNA_gen | 0      | 0      |
| chr18_43669218_43669newMicroRNA_gen | 0      | 0      |
| chr1_85599446_855995newMicroRNA_gen | 0      | 0      |
| chr18_9914924_991504newMicroRNA_gen | 0      | 0      |
| chr19_11606316_11606newMicroRNA_gen | 0      | 0      |
| chr19_13947063_13947newMicroRNA_gen | 755    | 767    |
| chr19_13947219_13947newMicroRNA_gen | 57,723 | 57,335 |
| chr19_13985486_13985newMicroRNA_gen | 0      | 0      |
| chr19_14192493_14192newMicroRNA_gen | 0      | 0      |
| chr19_3201433_320155newMicroRNA_gen | 0      | 0      |
| chr19_40788435_40788newMicroRNA_gen | 0      | 0      |
| chr19_41859578_41859newMicroRNA_gen | 0      | 0      |
| chr19_46142233_46142newMicroRNA_gen | 0      | 0      |
| chr19_52195858_52195newMicroRNA_gen | 82,000 | 86,804 |
| chr19_52196468_52196newMicroRNA_gen | 85,400 | 78,922 |
| chr19_5240109_524024newMicroRNA_gen | 0      | 0      |
| chr19_54485540_54485newMicroRNA_gen | 0      | 0      |
| chr19_6531201_653133newMicroRNA_gen | 0      | 0      |
| chr19_7951849_795193newMicroRNA_gen | 0      | 0      |
| chr1_98510783_985109newMicroRNA_gen | 584    | 0      |
| chr20_22012778_22012newMicroRNA_gen | 0      | 0      |
| chr20_26189308_26189newMicroRNA_gen | 0      | 0      |
| chr20_3898107_389825newMicroRNA_gen | 515    | 663    |
| chr20_42021115_42021newMicroRNA_gen | 0      | 0      |
| chr20_57392655_57392newMicroRNA_gen | 0      | 0      |
| chr20_62370893_62370newMicroRNA_gen | 0      | 0      |
| chr2_109870385_10987newMicroRNA_gen | 0      | 0      |
| chr21_15457195_15457newMicroRNA_gen | 0      | 0      |
| chr21_26946260_26946newMicroRNA_gen | 0      | 0      |
| chr2_133011947_13301newMicroRNA_gen | 0      | 0      |
| chr2_133012177_13301newMicroRNA_gen | 0      | 0      |
| chr2_133012565_13301newMicroRNA_gen | 0      | 0      |
| chr2_133012896_13301newMicroRNA_gen | 0      | 0      |
| chr2_133038042_13303newMicroRNA_gen | 0      | 0      |
| chr2_133191264_13319newMicroRNA_gen | 0      | 0      |
| chr21_37632200_37632newMicroRNA_gen | 0      | 0      |
| chr2_159440625_15944newMicroRNA_gen | 0      | 0      |
| chr2_175199631_17519newMicroRNA_gen | 0      | 0      |
| chr2_177053535_17705newMicroRNA_gen | 0      | 0      |
| chr2_17934503_179346newMicroRNA_gen | 0      | 0      |
| chr2_182914180_18291newMicroRNA_gen | 0      | 0      |
| chr21_9826263_982654newMicroRNA_gen | 0      | 0      |

|                                       |        |        |
|---------------------------------------|--------|--------|
| chr21_9827147_982740 newMicroRNA_gen  | 0      | 0      |
| chr2_205766568_205766 newMicroRNA_gen | 0      | 0      |
| chr2_207974685_207974 newMicroRNA_gen | 0      | 0      |
| chr2_208619505_208619 newMicroRNA_gen | 0      | 0      |
| chr22_18190128_181901 newMicroRNA_gen | 0      | 0      |
| chr2_219267340_219267 newMicroRNA_gen | 7,383  | 11,369 |
| chr2_219866340_219866 newMicroRNA_gen | 0      | 0      |
| chr22_20020636_200206 newMicroRNA_gen | 0      | 174    |
| chr2_220158834_220158 newMicroRNA_gen | 0      | 0      |
| chr22_22007236_220072 newMicroRNA_gen | 0      | 0      |
| chr22_22007565_220075 newMicroRNA_gen | 1,751  | 2,685  |
| chr22_28193780_281937 newMicroRNA_gen | 0      | 0      |
| chr2_228463727_228463 newMicroRNA_gen | 0      | 0      |
| chr2_230045517_230045 newMicroRNA_gen | 0      | 0      |
| chr22_31127524_311275 newMicroRNA_gen | 0      | 0      |
| chr2_232321128_232321 newMicroRNA_gen | 0      | 0      |
| chr22_36682858_366828 newMicroRNA_gen | 0      | 0      |
| chr22_39715014_397150 newMicroRNA_gen | 137    | 0      |
| chr22_42296918_422969 newMicroRNA_gen | 0      | 0      |
| chr22_43011305_430113 newMicroRNA_gen | 0      | 0      |
| chr22_45596824_455968 newMicroRNA_gen | 0      | 0      |
| chr22_47488447_474884 newMicroRNA_gen | 0      | 0      |
| chr2_25551488_255514 newMicroRNA_gen  | 0      | 0      |
| chr2_69330782_693307 newMicroRNA_gen  | 0      | 0      |
| chr3_117118355_117118 newMicroRNA_gen | 0      | 0      |
| chr3_127305919_127305 newMicroRNA_gen | 0      | 0      |
| chr3_129116032_129116 newMicroRNA_gen | 0      | 0      |
| chr3_140770354_140770 newMicroRNA_gen | 0      | 0      |
| chr3_160122515_160122 newMicroRNA_gen | 31,145 | 36,933 |
| chr3_184870280_184870 newMicroRNA_gen | 0      | 0      |
| chr3_188406562_188406 newMicroRNA_gen | 71,905 | 57,823 |
| chr3_189900481_189900 newMicroRNA_gen | 0      | 0      |
| chr3_194355212_194355 newMicroRNA_gen | 0      | 0      |
| chr3_35785957_357860 newMicroRNA_gen  | 0      | 0      |
| chr3_44155690_441556 newMicroRNA_gen  | 240    | 174    |
| chr3_49057572_490575 newMicroRNA_gen  | 0      | 1,186  |
| chr3_49058044_490581 newMicroRNA_gen  | 0      | 0      |
| chr3_55886518_558865 newMicroRNA_gen  | 0      | 0      |
| chr3_62861095_628612 newMicroRNA_gen  | 0      | 0      |
| chr3_9756999_9757087 newMicroRNA_gen  | 0      | 0      |
| chr4_107924743_107924 newMicroRNA_gen | 0      | 0      |
| chr4_110409844_110409 newMicroRNA_gen | 0      | 0      |
| chr4_114682362_114682 newMicroRNA_gen | 0      | 0      |
| chr4_115577889_115577 newMicroRNA_gen | 0      | 0      |
| chr4_157893001_157893 newMicroRNA_gen | 0      | 0      |
| chr4_38869630_388697 newMicroRNA_gen  | 0      | 0      |
| chr4_67142533_671425 newMicroRNA_gen  | 0      | 0      |



|                                     |         |         |
|-------------------------------------|---------|---------|
| chr4_8271456_8271578newMicroRNA_gen | 0       | 0       |
| chr4_82885781_828859newMicroRNA_gen | 0       | 0       |
| chr5_134262189_13426newMicroRNA_gen | 0       | 0       |
| chr5_136983249_13698newMicroRNA_gen | 3,812   | 4,185   |
| chr5_148441871_14844newMicroRNA_gen | 0       | 0       |
| chr5_148808457_14880newMicroRNA_gen | 1,511   | 907     |
| chr5_148810184_14881newMicroRNA_gen | 0       | 0       |
| chr5_157120857_15712newMicroRNA_gen | 0       | 0       |
| chr5_15935263_159353newMicroRNA_gen | 0       | 0       |
| chr5_167987887_16798newMicroRNA_gen | 0       | 0       |
| chr5_168690576_16869newMicroRNA_gen | 0       | 0       |
| chr5_171831797_17183newMicroRNA_gen | 0       | 0       |
| chr5_172447694_17244newMicroRNA_gen | 0       | 0       |
| chr5_175794923_17579newMicroRNA_gen | 240     | 174     |
| chr5_180670276_18067newMicroRNA_gen | 0       | 0       |
| chr5_36147969_361481newMicroRNA_gen | 0       | 0       |
| chr5_58999414_589995newMicroRNA_gen | 687     | 558     |
| chr5_63935960_639361newMicroRNA_gen | 0       | 0       |
| chr6_133137922_13313newMicroRNA_gen | 0       | 0       |
| chr6_14253015_142531newMicroRNA_gen | 0       | 0       |
| chr6_167411293_16741newMicroRNA_gen | 0       | 0       |
| chr6_27173872_271740newMicroRNA_gen | 0       | 0       |
| chr6_28918846_289189newMicroRNA_gen | 0       | 0       |
| chr6_33175595_331757newMicroRNA_gen | 0       | 0       |
| chr6_6169536_6169678newMicroRNA_gen | 0       | 0       |
| chr6_72086627_720867newMicroRNA_gen | 0       | 0       |
| chr6_72113216_721133newMicroRNA_gen | 206,992 | 159,693 |
| chr7_1062556_1062686newMicroRNA_gen | 893     | 628     |
| chr7_127847889_12784newMicroRNA_gen | 0       | 0       |
| chr7_129410212_12941newMicroRNA_gen | 0       | 0       |
| chr7_129414501_12941newMicroRNA_gen | 0       | 0       |
| chr7_130135951_13013newMicroRNA_gen | 137     | 209     |
| chr7_137084354_13708newMicroRNA_gen | 0       | 0       |
| chr7_143079609_14307newMicroRNA_gen | 0       | 0       |
| chr7_148638566_14863newMicroRNA_gen | 0       | 0       |
| chr7_150935500_15093newMicroRNA_gen | 2,198   | 1,430   |
| chr7_5535424_5535566newMicroRNA_gen | 3,915   | 2,860   |
| chr7_99691374_996914newMicroRNA_gen | 0       | 3,627   |
| chr7_99691589_996917newMicroRNA_gen | 790     | 698     |
| chr8_10892690_108928newMicroRNA_gen | 0       | 0       |
| chr8_109304623_10930newMicroRNA_gen | 0       | 0       |
| chr8_141742643_14174newMicroRNA_gen | 36,673  | 32,050  |
| chr8_144897543_14489newMicroRNA_gen | 0       | 0       |
| chr8_1470010_1470152newMicroRNA_gen | 0       | 0       |
| chr8_22102476_221025newMicroRNA_gen | 6,250   | 5,266   |
| chr8_48650469_486505newMicroRNA_gen | 0       | 0       |
| chr8_48921172_489212newMicroRNA_gen | 0       | 0       |

|                        |                 |         |         |
|------------------------|-----------------|---------|---------|
| chr8_99405855_994059   | newMicroRNA_gen | 0       | 0       |
| chr9_111808475_111808  | newMicroRNA_gen | 0       | 0       |
| chr9_116971687_116971  | newMicroRNA_gen | 721     | 698     |
| chr9_127454717_127454  | newMicroRNA_gen | 2,266   | 1,674   |
| chr9_131870066_131870  | newMicroRNA_gen | 0       | 0       |
| chr9_134365890_134365  | newMicroRNA_gen | 0       | 0       |
| chr9_139565906_139565  | newMicroRNA_gen | 2,884   | 2,197   |
| chr9_18573284_185734   | newMicroRNA_gen | 0       | 244     |
| chr9_28888845_288888   | newMicroRNA_gen | 0       | 0       |
| chr9_32456268_324564   | newMicroRNA_gen | 0       | 0       |
| chr9_79186819_791868   | newMicroRNA_gen | 0       | 0       |
| chr9_97847471_978474   | newMicroRNA_gen | 1,408   | 3,174   |
| chr9_97847710_978477   | newMicroRNA_gen | 140,959 | 142,395 |
| chrX_109298554_109298  | newMicroRNA_gen | 0       | 0       |
| chrX_133303687_133303  | newMicroRNA_gen | 0       | 0       |
| chrX_133680633_133680  | newMicroRNA_gen | 824     | 1,186   |
| chrX_145109282_145109  | newMicroRNA_gen | 0       | 0       |
| chrX_151127017_151127  | newMicroRNA_gen | 0       | 0       |
| chrX_151128074_151128  | newMicroRNA_gen | 378     | 349     |
| chrX_45605576_456055   | newMicroRNA_gen | 109,849 | 146,859 |
| chrX_45606397_456063   | newMicroRNA_gen | 550,720 | 466,070 |
| chrX_49767731_497677   | newMicroRNA_gen | 1,545   | 1,221   |
| chrX_49768083_497680   | newMicroRNA_gen | 0       | 0       |
| chrX_49773036_497731   | newMicroRNA_gen | 4,086   | 3,871   |
| chrX_49773536_497735   | newMicroRNA_gen | 0       | 0       |
| chrX_49774319_497744   | newMicroRNA_gen | 1,339   | 0       |
| chrX_49777829_497777   | newMicroRNA_gen | 481     | 767     |
| chrX_49779187_497791   | newMicroRNA_gen | 0       | 0       |
| chrX_8094981_809511    | newMicroRNA_gen | 0       | 0       |
| chrX_85158629_851587   | newMicroRNA_gen | 1,889   | 3,348   |
| chrY_10035593_100355   | newMicroRNA_gen | 0       | 0       |
| chr10_53059307_530593  | newMicroRNA_hor | 0       | 0       |
| chr1_1102463_110259    | newMicroRNA_hor | 0       | 0       |
| chr1_1103213_110335    | newMicroRNA_hor | 0       | 0       |
| chr11_121970442_121970 | newMicroRNA_hor | 0       | 0       |
| chr11_568081_568204    | newMicroRNA_hor | 0       | 0       |
| chr1_172113664_172113  | newMicroRNA_hor | 2,919   | 2,930   |
| chr1_198828160_198828  | newMicroRNA_hor | 243,837 | 234,674 |
| chr1_207975173_207975  | newMicroRNA_hor | 0       | 732     |
| chr12_127650667_127650 | newMicroRNA_hor | 0       | 0       |
| chr12_7073246_707336   | newMicroRNA_hor | 0       | 0       |
| chr14_101340813_101340 | newMicroRNA_hor | 0       | 349     |
| chr14_101351030_101351 | newMicroRNA_hor | 6,902   | 5,615   |
| chr14_101490105_101490 | newMicroRNA_hor | 858     | 732     |
| chr14_101491317_101491 | newMicroRNA_hor | 0       | 0       |
| chr14_101505993_101505 | newMicroRNA_hor | 412     | 209     |
| chr14_101506543_101506 | newMicroRNA_hor | 824     | 802     |

|                                     |           |           |
|-------------------------------------|-----------|-----------|
| chr14_101507105_1015newMicroRNA_hor | 0         | 0         |
| chr14_101531620_1015newMicroRNA_hor | 36,605    | 37,770    |
| chr1_41220012_412201newMicroRNA_hor | 0         | 0         |
| chr1_65524089_655242newMicroRNA_hor | 858       | 942       |
| chr16_73091853_73091newMicroRNA_hor | 0         | 0         |
| chr17_1617166_161731newMicroRNA_hor | 1,131,452 | 1,129,183 |
| chr17_29887014_29887newMicroRNA_hor | 1,820     | 2,337     |
| chr17_46114512_46114newMicroRNA_hor | 790       | 1,779     |
| chr18_19405632_19405newMicroRNA_hor | 0         | 0         |
| chr19_10928064_10928newMicroRNA_hor | 2,919     | 2,930     |
| chr19_46000191_46000newMicroRNA_hor | 0         | 0         |
| chr19_52196009_52196newMicroRNA_hor | 56,212    | 64,693    |
| chr20_61162109_61162newMicroRNA_hor | 0         | 0         |
| chr21_17911405_17911newMicroRNA_hor | 0         | 0         |
| chr21_17962543_17962newMicroRNA_hor | 28,776    | 29,365    |
| chr2_133011947_13301newMicroRNA_hor | 0         | 0         |
| chr2_133038048_13303newMicroRNA_hor | 0         | 0         |
| chr2_177015047_17701newMicroRNA_hor | 0         | 0         |
| chr22_46508592_46508newMicroRNA_hor | 3,400     | 3,592     |
| chr22_46509540_46509newMicroRNA_hor | 47,799    | 48,825    |
| chr3_188406540_18840newMicroRNA_hor | 549       | 279       |
| chr3_38010883_38010newMicroRNA_hor  | 181,719   | 205,100   |
| chr3_49058030_490581newMicroRNA_hor | 376,933   | 410,200   |
| chr4_38869631_388697newMicroRNA_hor | 2,472     | 2,720     |
| chr5_122990785_12299newMicroRNA_hor | 0         | 0         |
| chr5_149112349_14911newMicroRNA_hor | 3,400     | 3,069     |
| chr5_150747981_15074newMicroRNA_hor | 652       | 244       |
| chr5_71146764_711468newMicroRNA_hor | 0         | 0         |
| chr7_129410216_12941newMicroRNA_hor | 0         | 0         |
| chr7_129414722_12941newMicroRNA_hor | 2,163     | 279       |
| chr7_25989535_259896newMicroRNA_hor | 0         | 0         |
| chr8_141060651_14106newMicroRNA_hor | 0         | 0         |
| chr8_141742644_14174newMicroRNA_hor | 155,588   | 135,629   |
| chr9_127454723_12745newMicroRNA_hor | 243,700   | 234,674   |
| chr9_131006998_13100newMicroRNA_hor | 0         | 2,930     |
| chr9_139565038_13956newMicroRNA_hor | 941,252   | 957,981   |
| chr9_21512092_215122newMicroRNA_hor | 26,647    | 27,551    |
| chr9_28888846_288889newMicroRNA_hor | 0         | 0         |
| chr9_96941082_969412newMicroRNA_hor | 8,756     | 10,846    |
| chrX_133675369_13367newMicroRNA_hor | 0         | 488       |
| chrX_139006302_13900newMicroRNA_hor | 0         | 0         |

**Supplemental Table S2. Selected hypertension-related genes**

| <u>Category</u>      | <u>Gene</u>                                                                         | <u>Gene symbol</u> |
|----------------------|-------------------------------------------------------------------------------------|--------------------|
| GWAS of hypertension | Mov10 RISC complex RNA helicase                                                     | MOV10              |
|                      | solute carrier family 4, sodium bicarbonate cotransporter, member 7                 | SLC4A7             |
|                      | MDS1 and EVI1 complex locus                                                         | MECOM              |
|                      | solute carrier family 39 (metal ion transporter), member 8                          | SLC39A8            |
|                      | calcium channel, voltage-dependent, beta 2 subunit                                  | CACNB2             |
|                      | guanylate cyclase 1, soluble, alpha 3                                               | GUCY1A3            |
|                      | guanylate cyclase 1, soluble, beta 3                                                | GUCY1B3            |
|                      | early B cell factor 1                                                               | EBF1               |
|                      | hemochromatosis                                                                     | HFE                |
|                      | branched-chain amino acid transaminase/abhydrolase domain containing 16A            | BAT2-BAT5          |
|                      | phospholipase C, epsilon 1                                                          | PLCE               |
|                      | adrenomedullin                                                                      | ADM                |
|                      | furin (paired basic amino acid cleaving enzyme)-FES proto-oncogene, tyrosine kinase | FURIN-FES          |
|                      | golgi SNAP receptor complex member 2                                                | GOSR2              |
|                      | jagged 1                                                                            | JAG1               |
|                      | GNAS complex locus                                                                  | GNAS               |
|                      | methylenetetrahydrofolate reductase (NAD(P)H)                                       | MTHFR              |
|                      | unc-51 like kinase 4                                                                | ULK4               |
|                      | fibroblast growth factor 5                                                          | FGF5               |
|                      | cytochrome P450 17A1                                                                | CYP17a1            |
|                      | 5'-nucleotidase, cytosolic II                                                       | NT5C2              |
|                      | pleckstrin homology domain containing, family A member 7                            | PLEKHA7            |
|                      | ATPase, Ca <sup>++</sup> transporting, plasma membrane 1                            | ATP2B1             |
|                      | SH2B adaptor protein 3                                                              | SH2B3              |
|                      | T-box 5                                                                             | TBX5               |
|                      | T-box 3                                                                             | TBX3               |
|                      | cytochrome P450, family 1, subfamily A, polypeptide 1                               | CYP1A1             |
|                      | unc-51 like kinase 3                                                                | ULK3               |
|                      | zinc finger protein 652                                                             | ZNF652             |

| <u>Category</u>       | <u>Gene</u>                                     | <u>Gene symbol</u> |
|-----------------------|-------------------------------------------------|--------------------|
| Cortisol Processing   | 11 $\beta$ -hydroxysteroid dehydrogenase type 1 | HSD11B1            |
|                       | 11 $\beta$ -hydroxysteroid dehydrogenase type 2 | HSD11B2            |
| Sympathetic signaling | alpha 1A receptor                               | ADRA1A             |
|                       | alpha 1B receptor                               | ADRA1B             |
|                       | alpha 1D receptor                               | ADRA1D             |
|                       | alpha 2A receptor                               | ADRA2A             |
|                       | alpha 2B receptor                               | ADRA2B             |
|                       | alpha 2C receptor                               | ADRA2C             |

|                  |                                                              |         |
|------------------|--------------------------------------------------------------|---------|
|                  | beta 1 receptor                                              | ADRB1   |
|                  | beta 2 receptor                                              | ADRB2   |
|                  | beta 3 receptor                                              | ADRB3   |
| Vasoconstriction | calcium channel, voltage-dependent, L type, alpha 1C subunit | CACNA1C |
|                  | calcium channel, voltage-dependent, L type, alpha 1D subunit | CACNA1D |
|                  | calcium channel, voltage-dependent, beta 2 subunit           | CACNB2  |
|                  | nitric oxide synthase 3 (endothelial)                        | NOS3    |
| Endothelin       | Endothelin-1 (EDN1)                                          | EDN1    |
|                  | Endothelin (EDN3)*                                           | EDN3    |
|                  | Endothelin Receptor A                                        | EDNRA   |
|                  | Endothelin Receptor B                                        | EDNRB   |
| Oxidative Stress | superoxide dismutase 1                                       | SOD1    |
|                  | superoxide dismutase 2                                       | SOD-2   |
|                  | superoxide dismutase 3                                       | SOD-3   |
|                  | catalase                                                     | CAT     |
|                  | NADPH oxidase 1                                              | NOX-1   |
|                  | NADPH oxidase 2                                              | NOX-2   |
|                  | NADPH oxidase 3                                              | NOX-3   |
|                  | NADPH oxidase 4                                              | NOX-4   |
|                  | NADPH oxidase 5                                              | NOX-5   |

### Supplemental Table S3. Primer sequences.

| Primer name         | Sequence (5'--> 3')             |
|---------------------|---------------------------------|
| hu ADM fw           | CTGATGTACCTGGGTTTCGCTCGCCTTCCTA |
| hu ADM rv           | GACATCCGCAGTTCCTCTTCC           |
| hu ADRA1B fw        | AACCCTTCTATGCCCTCTTCTCC         |
| hu ADRA1B rv        | CCTCTAGGTTCTTGGTGGTTCTCTT       |
| hu ADRA1D fw        | CCTACGAATTGGCCGACTACAG          |
| hu ADRA1D rv        | TGGGGTCCTTAAATATCGGTCTC         |
| hu ADRA2A fw        | CCTCCGTGCTTTTCTGGTTG            |
| hu ADRA2A rv        | CTGCCCTCCTCCCCTGACT             |
| hu ADRA2B fw        | GGGGGAGGAAGAAACGAAGAC           |
| hu ADRA2B rv        | GAACCACAGATCCGAAAACAGG          |
| hu ADRB1 fw         | GAAGCCCACAATCCTCGTCTG           |
| hu ADRB1 rv         | CTCCCATCCCTTCCCAAACCT           |
| hu ADRB2 fw         | CGCTACTTTGCCATTACTTCACC         |
| hu ADRB2 rv         | CACCCGGGCCTTATTCTTG             |
| hu ADRB3 fw         | TGAGAGCAGCAGGGTAGAAAAGAC        |
| hu ADRB3 rv         | GAGCAGTAATAAGGGAACCAGAGATA      |
| hu ATP2B1 fw        | GACTGATGCCGAAGATGATG            |
| hu ATP2B1 rv        | GTTGGGAGAGGGTGGAGGAC            |
| hu CACNA1C fw       | CATCGGGTTTGGTTTTCTTGATTA        |
| hu CACNA1C rv       | CCTGCAGCGGCTTCTATTGA            |
| hu CACNA1D fw       | GAGCCTGAGGAAACAAAACGAG          |
| hu CACNA1D rv       | AGGGGACGGTGGGTGGTA              |
| hu CACNB2 fw        | CTCCCCACCACCGACTCC              |
| hu CACNB2 rv        | CATTTTGCCCTGATTTCTTCTGA         |
| hu catalase fw      | GCAGGACAATCAGGGTGGTG            |
| hu catalase rv      | GAGTAACGTTATCATCATTGGCAGTG      |
| hu EDN1 fw          | CTGGGGATGACAATGGACCTC           |
| hu EDN1 rv          | ACCCGAATTCGAATGTGACTGT          |
| hu EDNRA fw         | ATTTTGAAGTGGCCAGATGAGTTTAT      |
| hu EDNRA rv         | AGATGTTGGGGTGGGGAGTTAG          |
| hu EDNRB fw         | TTGCATTTTTCGGACACTGGA           |
| hu EDNRB rv         | AATGCTGAGGTTTGGGCTTCTA          |
| hu ENaC $\gamma$ fw | AGCCCGAGAGCGAGCAGA              |
| hu ENaC $\gamma$ rv | GGCGAGGATGGGACTTTGAG            |
| hu FGF5 fw          | CCGCACAGGGGCTACAGAG             |
| hu FGF5 rv          | AGAAGAGGAGGAGGAGGAAGGAC         |
| hu Furin fw         | ACCGTGGCCTCATCTCCTACA           |
| hu Furin rv         | GGGCGCTCTGGTCTTTGATAA           |
| hu GOSR2 fw         | CACTGTAAGAAAAGCCAAACTCCA        |
| hu GOSR2 rv         | GGCAAAGGGTGTACAGAACTCC          |
| hu JAG1 fw          | CGCGTGACCTGTGATGACTACT          |
| hu JAG1 rv          | TGGGGCGGCAGAACTTATT             |
| hu MTHFR fw         | GAACCAGGGAGGAGAGGAAATG          |
| hu MTHFR rv         | CTAGCAGGCACAGCACAGACC           |

|               |                             |
|---------------|-----------------------------|
| hu NHE2 fw    | GGTTGGACTTCTACTAGGTGGGATTAT |
| hu NHE2 rv    | TTCATTGCAGGGGGAGACTTC       |
| hu NOX2 fw    | TGTCAAGTGCCCAAAGGTGTC       |
| hu NOX2 rv    | AGGGGCGGATGTCAGTGTA         |
| hu NOX4 fw    | AGATGTTGGGGCTAGGATTGTGT     |
| hu NOX4 rv    | AAGGATAAGGCTGCAGTTGAGGT     |
| hu PLEKHA7 fw | TCCAGCAGTCGTCCACCATT        |
| hu PLEKHA7 rv | GGCGCTCCAAGGCACTCT          |
| hu RAC1 fw    | ATGGGATACAGCTGGACAAGAAG     |
| hu RAC1 rv    | AAGGGAAAAGCAAATTAAGAACACA   |
| hu SH2B3 fw   | TGGCCACTGTCCCTTCTAAATG      |
| hu SH2B3 rv   | AACTGTTCTTGCCACCCTCCTAT     |
| hu Slc4a7 fw  | TAAAGCCAATGATTCCCCTCTG      |
| hu Slc4a7 rv  | AACTCCTGATTATTTACGCCTACTTAT |
| hu TBX3 fw    | GCGCGACTATGTTTGCTGATT       |
| hu TBX3 rv    | AAAGGGAGGAGGGGAAGTGTC       |
| hu TBX5 fw    | CACTCAAGGTCGCTGGATGC        |
| hu TBX5 rv    | GTGGCTGGTTGATGGGTGTG        |

**A. Strategy for identifying relevant miRNA-mRNA target pairs in HMVEC-D**

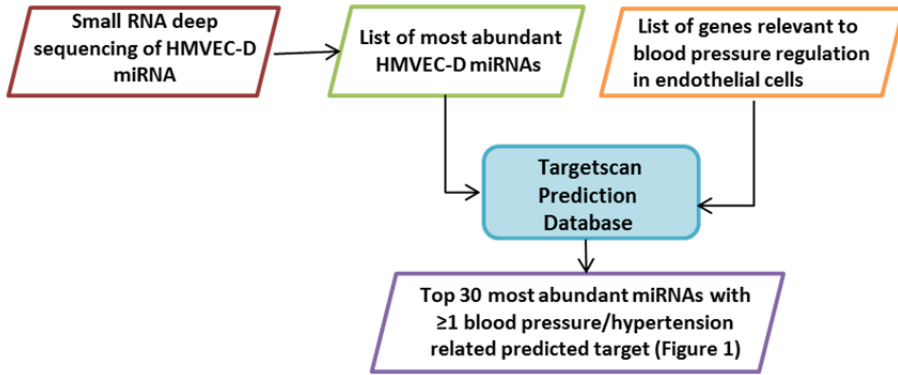

**B. Strategy for evaluating miRNA regulation of gene expression**

- 1.) HMVEC-D culture (3x 96 well plates)
- 2.) Transfection with 30 LNA-anti-miR's (n=3/plate; control n=6)
- 3.) RNA Extraction (BioRad Aurum Kit)
- 4.) qRT-PCR analysis (384 well format, numerous plates; 3 technical reps/sample)
- 5.) mRNA Abundance analysis (reported as % of avg. control from each plate)

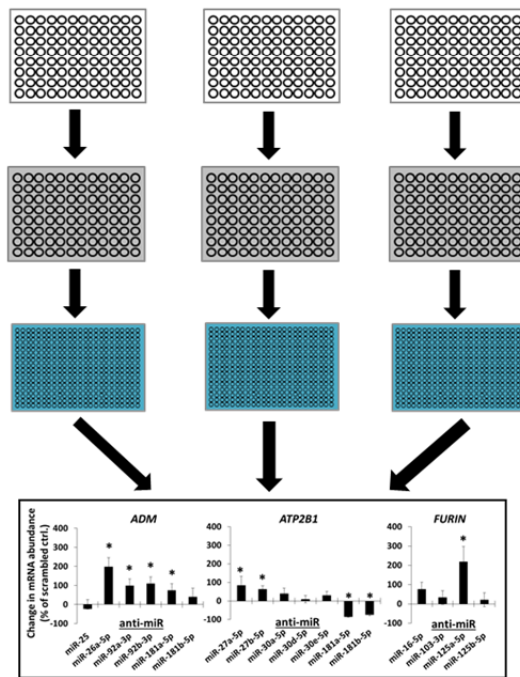

**Supplemental Figure S1.** Study strategy. A) We performed small RNA deep sequencing on HMVEC-D, identifying the most abundant miRNAs. We compiled a list of protein-coding genes that have been associated with hypertension in human genome-wide association studies or are known to be functionally relevant to vascular endothelial cells and the regulation of blood pressure or development of hypertension. Target prediction databases were searched to identify the 30 most abundant miRNAs that had predicted targets on our list. We then performed our cell culture and qPCR analysis (B). LNA-anti-miRs targeting the identified miRNAs of interest were transfected in HMVEC-D in triplicate in 3 separate plates, for a total of 9 replicates per LNA anti-miR. The Aurum kit (Biorad) kit was used to isolate RNA for qRT-PCR analysis.



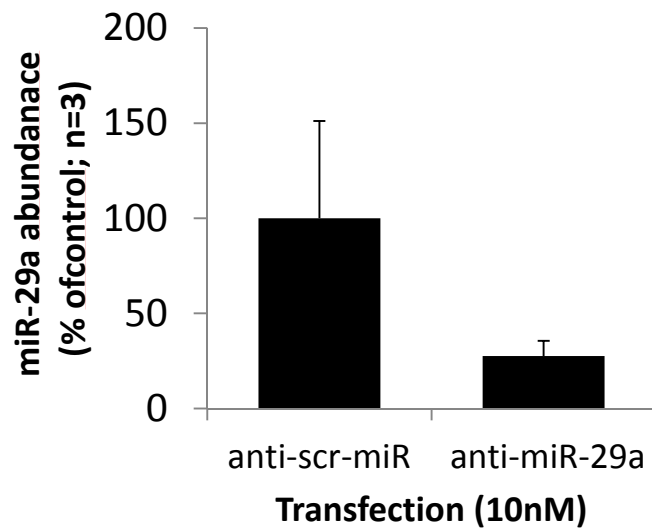

**Supplemental Figure S2.** Verification of the efficiency of anti-miR transfection at 10 nM. HMVEC-D were transfected with 10 nM anti-scr-miR or anti-miR-29a for 48 hours and the abundance of miR-29a was measured.
